1

Version dated: September 19, 2017

2 RH: PHYLOGENETIC COMPARATIVE METHODS ON NETWORKS

3 **Phylogenetic comparative methods on phylogenetic**  
4 **networks with reticulations**

5 PAUL BASTIDE<sup>1,2</sup>, CLAUDIA SOLÍS-LEMUS<sup>3</sup>, RICARDO KRIEBEL<sup>4</sup>, K. WILLIAM  
6 SPARKS<sup>4</sup>, CÉCILE ANÉ<sup>3,4</sup>

7 <sup>1</sup> *UMR MIA-Paris, AgroParisTech, INRA, Université Paris-Saclay, 75005, Paris, France*

8 <sup>2</sup> *MaIAGE, INRA, Université Paris-Saclay, 78352 Jouy-en-Josas, France*

9 <sup>3</sup> *Department of Statistics, University of Wisconsin-Madison, WI, 53706, USA*

10 <sup>4</sup> *Department of Botany, University of Wisconsin-Madison, WI, 53706, USA*

11 **Corresponding author:** Paul Bastide, UMR MIA-Paris, AgroParisTech, INRA,  
12 Université Paris-Saclay, 16 rue Claude Bernard, 75005, Paris, France; E-mail:  
13 paul.bastide@m4x.org.

14

15 *Abstract.*— The goal of Phylogenetic Comparative Methods (PCMs) is to study the  
16 distribution of quantitative traits among related species. The observed traits are often seen  
17 as the result of a Brownian Motion (BM) running along a phylogenetic tree. Reticulation  
18 events such as hybridization, gene flow or horizontal gene transfer, can substantially affect  
19 a species' traits, but are not modeled by a tree. *Phylogenetic networks* have been designed  
20 to represent reticulate evolution. As they become available for downstream analyses, new  
21 models of trait evolution are needed, applicable to networks. One natural extension of the  
22 BM is to use a weighted average model for the trait of a hybrid, at a reticulation point. We  
23 develop here an efficient recursive algorithm to compute the phylogenetic variance matrix  
24 of a trait on a network, in only one preorder traversal of the network. We then extend the  
25 standard PCM tools to this new framework, including phylogenetic regression with  
26 covariates (or phylogenetic ANOVA), ancestral trait reconstruction, and Pagel's  $\lambda$  test of  
27 phylogenetic signal. The trait of a hybrid is sometimes outside of the range of its two  
28 parents'. Hybrid vigor and hybrid depression is indeed a rather common phenomenon  
29 observed in present-day hybrids. Transgressive evolution can be modeled as a shift in the  
30 trait value following a reticulation point. We develop a general framework to handle such  
31 shifts, and take advantage of the phylogenetic regression view of the problem to design  
32 statistical tests for ancestral transgressive evolution in the evolutionary history of a group  
33 of species. We study the power of these tests in several scenarios, and show that recent  
34 events have indeed the strongest impact on the trait distribution of present-day taxa. We  
35 apply those methods to a dataset of *Xiphophorus* fishes, to confirm and complete previous  
36 analysis in this group. All the methods developed here are available in the user-friendly  
37 julia package *PhyloNetworks*.

38 (Keywords: Phylogenetic Networks, Phylogenetic Comparative Methods, Transgressive  
39 Evolution, Heterosis, *PhyloNetworks*)

41           The evolutionary history of species is known to shape the present-day distribution  
42 of observed characters (Felsenstein 1985). Phylogenetic Comparative Methods (PCMs)  
43 have been developed to account for correlations induced by a shared history in the analysis  
44 of a quantitative dataset (Pennell and Harmon 2013). They usually rely on two main  
45 ingredients: a time-calibrated phylogenetic tree, and a dynamical model of trait evolution,  
46 that should be chosen to capture the features of the trait evolution over time. Much work  
47 has been made on the second ingredient, with more and more sophisticated models of trait  
48 evolution, with numerous variations around the original Brownian Motion (BM), see for  
49 instance Felsenstein (1985); Hansen and Martins (1996); Hansen (1997); Blomberg et al.  
50 (2003); Butler and King (2004); Beaulieu et al. (2012); Landis et al. (2013); Blomberg  
51 (2016), to cite only but a few.

52           In contrast, the first assumption has not been questioned until now (Jhwueng and  
53 O'Meara 2017). However, phylogenetic trees are not always adapted to capture  
54 relationships between species, and *phylogenetic networks* are sometimes needed.  
55 Phylogenetic networks differ from trees by added reticulation points, where two distinct  
56 branches come together to create a new species. Such reticulations can represent various  
57 biological mechanisms, like hybridization, gene flow or horizontal gene transfer, that are  
58 known to be common in some groups of organisms (Mallet 2005, 2007). Ignoring those  
59 events can lead to misleading tree inference (Kubatko 2009; Solís-Lemus et al. 2016; Long  
60 and Kubatko 2017). Thanks to recent methodological developments, the statistical

61 inference of reliable phylogenetic networks has become possible (Maddison 1997; Degnan  
62 and Salter 2005; Kubatko 2009; Yu et al. 2012, 2014; Yu and Nakhleh 2015; Solís-Lemus  
63 and Ané 2016). Although these state-of-the-art methods are still limited by their  
64 computational burden, we believe that the use of these networks will increase in the future.  
65 The goal of this work is to propose an adaptation of standard PCMs to a group of species  
66 with reticulate evolution, related by a network instead of a tree.

67         We describe an extension of the BM model of trait evolution to a network. The  
68 main modeling choice is about the fate of hybrid species. How should these species inherit  
69 their trait from their two parents? In this work, we first choose a weighted-average merging  
70 rule: the trait of a hybrid is a mixture of its two parents', weighted by their relative genetic  
71 contributions. This rule can be seen as a reasonable null model. But in some cases, the  
72 trait of a hybrid is observed to be outside of the range of its two parents. This phenomenon  
73 can be modeled by a *shift* in the trait value occurring right after the reticulation point: the  
74 hybrid trait value being the weighted average of the two parents, plus an extra term  
75 specific to the hybridization event at hand. Such a shift can model several biological  
76 mechanisms, such as transgressive segregation (Rieseberg et al. 1999) or heterosis (Fiévet  
77 et al. 2010; Chen 2013), with hybrid vigor (when the hybrid species is particularly fit to its  
78 environment) or depression (when the hybrid is ill-fit). In the following, we will refer to  
79 this class of phenomena using the generic term transgressive evolution. Here, this term  
80 only refers to the hybrid trait being different from the weighted average of its parents. This  
81 model allows for an explicit mathematical derivation of the trait distribution at the tips of  
82 the network and extends to networks the use of standard PCM tools such as phylogenetic  
83 regression (Grafen 1989, 1992), ancestral state reconstruction (Felsenstein 1985; Schluter  
84 et al. 1997) or tests of phylogenetic signal (Pagel 1999).

85         In the following, we first describe this BM model of trait evolution and show how it  
86 fits into the standard PCM framework. We then show how to add shifts in the trait values

87 to model transgressive evolution. We propose a statistical test for transgressive evolution.  
88 These methods are validated with a simulation study, and with the theoretical study of the  
89 power of the tests in a range of scenarios. Finally, we revisit the analysis of a *Xiphophorus*  
90 dataset about sword index and female preference made by Cui et al. (2013), in the light of  
91 our new network methods.

## 92 MODEL

93 In our model for trait evolution on a phylogenetic network, the novel aspect is the  
94 merging rule at reticulation events, compared to standard PCMs on trees. Our model is  
95 very similar to that defined in Jhwueng and O'Meara (2017), but we adopt a different  
96 statistical view point, based on the phylogenetic linear regression representation.

### 97 *Trait Evolution on Networks*

98 *Phylogenetic Network.*— In this work, we assume that we have access to a *rooted, calibrated*  
99 *and weighted phylogenetic network* that describes the relationships between a set of  
100 observed species (Huson et al. 2010). In such a network, reticulations, or *hybrids*, are nodes  
101 that have two parent nodes. They receive a given proportion of their genetic material from  
102 each parent. This proportion is controlled by a weight  $\gamma_e$  that represents the *inheritance*  
103 *probability* associated with each branch  $e$  of the network. A branch that is *tree-like*, i.e.  
104 that ends at a non-hybrid node, has a weight  $\gamma_e = 1$ . We further assume that the length  $\ell_e$   
105 of a branch  $e$  represents evolutionary time. In the example in Figure 1a, the two hybrid  
106 edges have length zero, but this need not to be the case, see Jhwueng and O'Meara (2017);  
107 Degnan (2017).

108 *Brownian Motion.*— Since the seminal article of Felsenstein (1985), the Brownian Motion  
109 (BM) has been intensively used to model trait evolution on phylogenetic trees. It is well

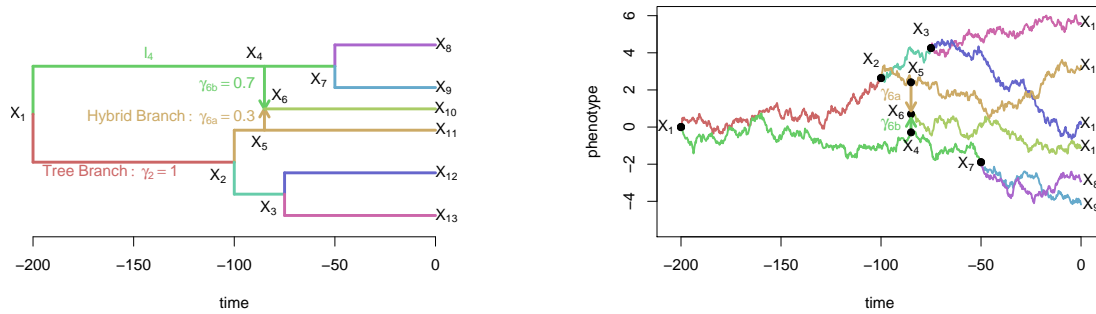

(a) A time-calibrated phylogenetic network

(b) BM on the branches of the network

Figure 1: Realization of a BM (with  $\mu = 0$  and  $\sigma^2 = 0.04$ ) on a calibrated network. The color of each branch (left) matches the color of the corresponding process (right). Only tip values are observed (here at time  $t = 0$ ). For simplicity, the two hybrid branches were chosen to have a length of 0, but this need not be the case. Inheritance probabilities at the hybridization event are  $\gamma_{6a}$  and  $\gamma_{6b}$ , with  $\gamma_{6a} + \gamma_{6b} = 1$ .

110 adapted to model several biological processes, from random genetic drift, to rapid  
 111 adaptation to a fluctuating environment (see e.g. Felsenstein 2004, Chap. 24). In order to  
 112 adapt this process to a network instead of a tree, we define a weighted average merging rule  
 113 at hybrids, as defined below. This rule expresses the idea that a hybrid inherits its trait  
 114 from both its parents, with a relative weight determined by the proportion of genetic  
 115 material received from each: if it inherits 90% of its genes from parent  $A$ , then 90% of its  
 116 trait value should be determined by the trait of  $A$ . Because the BM usually models the  
 117 evolution of a polygenic character, that is the additive result of the expression of numerous  
 118 genes, this rule is a natural null hypothesis.

119 **Definition 1** (BM on a Network). Consider a rooted phylogenetic network with branch  
 120 lengths and inheritance probabilities. Let  $X_v$  be the random variable describing the trait  
 121 value of node (or vertex)  $v$ .

- 122 • At the root node  $\rho$ , we assume that  $X_\rho = \mu$  is fixed.

- 123 • For a tree node  $v$  with parent node  $a$ , we assume that  $X_v$  is normally distributed  
124 with mean  $X_a + \Delta_e$  and with variance  $\sigma^2 \ell_e$ , with  $\sigma^2$  the variance rate of the BM, and  
125  $\ell_e$  the length of the parent edge  $e$  from  $a$  to  $v$ .  $\Delta_e$  is a (fixed) shift value associated  
126 with branch  $e$ , possibly equal to 0.
- 127 • For a hybrid node  $v$  with parent nodes  $a$  and  $b$ , we assume that  $X_v$  is normally  
128 distributed with mean  $\gamma_{e_a} X_a + \gamma_{e_b} X_b$ , where  $e_a$  and  $e_b$  are the hybrid edges from  $a$   
129 (and  $b$ ) to  $v$ . If these edges have length 0, meaning that  $a$ ,  $b$  and their hybrid  $v$  are  
130 contemporary, then  $X_v$  is assumed to have variance 0, conditional on the parent  
131 traits  $X_a$  and  $X_b$ . In general, the conditional variance of  $X_v$  is  $\gamma_{e_a} \sigma^2 \ell_{e_a} + \gamma_{e_b} \sigma^2 \ell_{e_b}$ .  
132 For the sake of identifiability, shifts are not allowed on hybrid branches (see Section  
133 on Transgressive Evolution for further details).

134 An example of such a process (without shift) is presented Figure 1b. This process is  
135 the same as in Jhwueng and O’Meara (2017), except that the shifts are treated differently.  
136 See Section on Transgressive Evolution and Discussion for more information on the links  
137 and differences between the two models. For the sake of generality, shifts are allowed on  
138 any tree edge. We will see in the next section how they are used to model transgressive  
139 evolution. In the rest of this section, we take all shifts to be zero, and only consider the  
140 un-shifted BM ( $\Delta_e = 0$  for all edges  $e$ ).

141 Note that the state at the root,  $\mu$ , could also be drawn from a Gaussian  
142 distribution, instead of being fixed. This would not change the derivations below, and  
143 would simply add a constant value to all terms in the variance matrix.

#### 144 *Variance Matrix*

145 *From a Tree to a Network.*— The distribution of trait values at all nodes,  $\mathbf{X}$ , can be fully  
146 characterized as a multivariate Gaussian with mean  $\mu \mathbf{1}_{m+n}$  and variance matrix  $\sigma^2 \mathbf{V}$ ,

147 where  $\mathbf{1}_{m+n}$  is the vector of ones,  $n$  is the number of tips and  $m$  the number of internal  
148 nodes. The variance matrix  $\mathbf{V}$ , which depends on the topology of the network, encodes the  
149 correlations induced by the phylogenetic relationships between taxa. When the network  
150 reduces to a tree (if there are no hybrids), then  $\mathbf{V}$  is the well-known BM covariance  
151 (Felsenstein 1985):  $V_{ij} = t_{ij}$  is the time of shared evolution between nodes  $i$  and  $j$ , i.e. the  
152 time elapsed between the root and the most recent common ancestor (mrca) of  $i$  and  $j$ .

153 When the network contains hybrids, this formula is not valid anymore. To see this,  
154 let's re-write  $t_{ij}$  as:

$$t_{ij} = \sum_{e \in p_i \cap p_j} \ell_e$$

155 where  $p_i$  is the path going from the root to node  $i$ . This formula just literally expresses  
156 that  $t_{ij}$  is the length of the shared path between the two nodes, that ends at their mrca.  
157 On a network, the difficulty is that there is *not a unique path* going from the root to a  
158 given node. Indeed, if there is a hybrid among the ancestors of node  $i$ , then a path might  
159 go “right” or “left” of the hybrid loop to go from the root to  $i$ .

160 Under the BM model in Definition 1 (with a fixed root), it turns out that we need  
161 to *sum* over all the possible paths going from the root to a given node, weighting paths by  
162 the inheritance probabilities  $\gamma_e$  of all the traversed edges:

$$V_{ij} = \sum_{\substack{p_i \in \mathcal{P}_i \\ p_j \in \mathcal{P}_j}} \left( \prod_{e \in p_i} \gamma_e \right) \left( \prod_{e \in p_j} \gamma_e \right) \sum_{e \in p_i \cap p_j} \ell_e \quad (1)$$

163 where  $\mathcal{P}_i$  denotes the set of all the paths going from the root to node  $i$ .

164 This general formula for  $\mathbf{V}$  was first presented in Pickrell and Pritchard (2012) in  
165 the context of population genomics. A formal proof is provided here (Appendix).

166 *Remark 1* (Variance reduction). From the expression above, we can show that the variance  
167 of any tip  $i$  decreases with each hybridization ancestral to  $i$ . Consider time-consistent



168 network, in the sense that *all* paths from the root to a given hybrid node have the same  
169 length, as expected if branch lengths measure calendar time. Note that this is the opposite  
170 of the “NELP” property (No Equally Long Paths) defined by Pardi and Scornavacca  
171 (2015). For tip  $i$ , let  $t_i$  be the length of any path from the root to  $i$ . If the network is a  
172 tree, then  $V_{ii} = t_i$ . If the history of tip  $i$  involves one or more reticulations, then we show  
173 (Appendix), that:

$$V_{ii} < t_i . \quad (2)$$

174 This shows that hybridization events, that imply taking a weighted means of two traits,  
175 cause the trait variance to decrease.

176 *Algorithm.*— The formula above, although general, is not practical to compute. Using the  
177 recursive characterization of the process given in Definition 1, we can derive an efficient  
178 way to compute this covariance matrix across all nodes in the network (tips and internal  
179 nodes), in a single traversal of the network. This traversal needs to be in “preorder”, from  
180 the root to the tips, such that any given node is listed after all of its parent(s): for any two  
181 nodes numbered  $i$  and  $j$ , if there is a directed path from  $i$  to  $j$ , then  $i \leq j$ . Such an  
182 ordering (also called topological sorting) can be obtained in linear time in the number of  
183 nodes and edges (Kahn 1962). On Figure 1a, nodes are numbered from 1 to 13 in preorder.  
184 The result below, proved in the Appendix, provides an efficient algorithm to compute the  
185 phylogenetic variance matrix  $\mathbf{V}$  in a time linear in the number of nodes of the network, in  
186 a single preorder traversal.

187 **Proposition 1** (Iterative computation of the phylogenetic variance). *Assume that the*  
188 *nodes of a network are numbered in preorder. Then  $\mathbf{V}$  can be calculated using the following*  
189 *step for each node  $i$ , from  $i = 1$  to  $i = n + m$ :*

- 190 • *If  $i = 1$  then  $i$  is the root, and  $V_{ii} = 0$ .*

191 • If  $i$  is a tree node, denote by  $a$  the parent of  $i$ , and by  $\ell_{e_a}$  the length of the branch  $e_a$   
 192 going from  $a$  to  $i$ . Then:

$$\begin{cases} V_{ij} = V_{aj} & \text{for all } 1 \leq j \leq i - 1 \\ V_{ii} = V_{aa} + \ell_{e_a} . \end{cases} \quad (3)$$

193 • If  $i$  is a hybrid node, denote by  $a$  and  $b$  the parents of  $i$ , by  $\ell_{e_a}$  and  $\ell_{e_b}$  the lengths of  
 194 the branches  $e_a$  and  $e_b$  going from  $a$  or  $b$  to  $i$ , and by  $\gamma_{e_a}$  and  $\gamma_{e_b}$  the associated  
 195 inheritances probabilities. Then:

$$\begin{cases} V_{ij} = \gamma_{e_a} V_{aj} + \gamma_{e_b} V_{bj} & \text{for all } 1 \leq j \leq i - 1 \\ V_{ii} = \gamma_{e_a}^2 (V_{aa} + \ell_{e_a}) + \gamma_{e_b}^2 (V_{bb} + \ell_{e_b}) + 2\gamma_{e_a} \gamma_{e_b} V_{ab} . \end{cases} \quad (4)$$

## 196 *Phylogenetic Regression*

197 We can now define a *phylogenetic regression* on networks, the same way it is defined  
 198 for phylogenetic trees (Grafen 1989, 1992).

199 *Linear Regression Framework.*— Define  $\mathbf{Y}$  as the vector of trait values observed at the tips  
 200 of the network. This is a sub-vector of the larger vector of trait values at all nodes. Let  
 201  $\mathbf{V}^{\text{tip}}$  be the sub-matrix of  $\mathbf{V}$ , with covariances between the observed taxa (tips). The  
 202 phylogenetic linear regression can be written as:

$$\mathbf{Y} = \mathbf{R}\boldsymbol{\theta} + \sigma^2\mathbf{E} \quad \text{with} \quad \mathbf{E} \sim \mathcal{N}(\mathbf{0}_n, \mathbf{V}^{\text{tip}}) \quad (5)$$

203 where  $\mathbf{R}$  is a  $n \times q$  matrix of regressors, and  $\boldsymbol{\theta}$  a vector of  $q$  coefficients. We can recover the  
 204 distribution of  $\mathbf{Y}$  under a simple BM with a fixed root value equal to  $\mu$  (and no shift) by

205 taking  $\mathbf{R} = \mathbf{1}_n$  and  $\boldsymbol{\theta} = \mu$  (with  $q = 1$ ). Regression matrix  $\mathbf{R}$  can also contain some  
206 explanatory trait variables of interest. In this phylogenetic regression, the BM model  
207 applies to the residual variation not explained by predictors,  $\mathbf{E}$ .

208 This formulation is very powerful, as it recasts the problem into the well-known  
209 linear regression framework. The variance matrix  $\mathbf{V}^{\text{tip}}$  is known (it is entirely characterized  
210 by the network used) so that, through a Cholesky factorization, we can reduce this  
211 regression to the canonical case of independent sampling units. This problem hence  
212 inherits all the features of the standard linear regression, such as confidence intervals for  
213 coefficients or data prediction, as explained in the next paragraph.

214 *Ancestral State Reconstruction and Missing Data.*— The phylogenetic variance matrix can  
215 also be used to do ancestral state reconstruction, or missing data imputation. Both tasks  
216 are equivalent from a mathematical point of view, rely on the Best Linear Unbiased  
217 Predictor (BLUP, see e.g. Robinson 1991) and are well known in the standard PCM  
218 toolbox. They have been implemented in many R packages, such as `ape` (Paradis et al.  
219 2004, function `ace`), `phytools` (Revell 2012, function `fastAnc`) or more recently `Rphylopars`  
220 (Goolsby et al. 2017, function `phylopars`). In our Julia package `PhyloNetworks`, it is available  
221 as function `ancestralStateReconstruction`.

222 *Pagel's  $\lambda$ .*— The variance structure induced by the BM can be made more flexible using  
223 standard transformations of the network branch lengths, such as Pagel's  $\lambda$  (Pagel 1999).  
224 Because the network is calibrated with node ages, it is time-consistent: the time  $t_i$  elapsed  
225 between the root and a given node  $i$  is well defined, and does not depend on the path taken.  
226 Hence, the lambda transform used on a tree can be extended to networks, as shown below.

227 **Definition 2** (Pagel's  $\lambda$  transform). First, for any hybrid tip in the network, add a child  
228 edge of length 0 to change this tip into an internal (hybrid) node, and transfer the data  
229 from the former hybrid tip to the new tip. Next, let  $e$  be a branch of the network, with

230 child node  $i$ , parent node  $\text{pa}(i)$ , and length  $\ell_e$ . Then its transformed length is given by:

$$\ell_e(\lambda) = \begin{cases} \lambda \ell_e & \text{if } i \text{ is an internal node} \\ \ell_e + (1 - \lambda)t_{\text{pa}(i)} = \lambda \ell_e + (1 - \lambda)t_i & \text{if } i \text{ is a tip,} \end{cases} \quad (6)$$

231 where  $t_i$  and  $t_{\text{pa}(i)}$  are the times elapsed from the root to node  $i$  and to its parent.

232 The interpretation of this transformation in term of phylogenetic signal is as usual:  
233 when  $\lambda$  decreases to zero, the phylogenetic structure is less and less important, and traits  
234 at the tips are completely independent for  $\lambda = 0$ . The first step of resolving hybrid tips is  
235 similar to a common technique to resolve polytomies in trees, using extra branches of  
236 length 0. This transformation does not change the interpretation of the network or the age  
237 of the hybrid. The added external edge does allow extra variation specific to the hybrid  
238 species, however, immediately after the hybridization, by Pagel's  $\lambda$  transformation. The  
239 second part of (6) applies to the new external tree edge, and hybrid edges are only affected  
240 by the first part of (6). The transformation's impact on the matrix  $\mathbf{V}^{\text{tip}}$  is not exactly the  
241 same as on trees. It still involves a simple multiplication of the off-diagonal terms by  $\lambda$ , but  
242 the diagonal terms are also modified. The following proposition is proved in the Appendix.

243 **Proposition 2** (Pagel's  $\lambda$  effect on the variance). *The phylogenetic variance of a BM*  
244 *running on a network transformed by a parameter  $\lambda$ ,  $\mathbf{V}(\lambda)$  is given by:*

$$\begin{cases} V(\lambda)_{ij} = \lambda V_{ij} & \text{for } i \text{ and } j \text{ such that } i \text{ or } j \text{ is an internal node, or } i \neq j \\ V(\lambda)_{ii} = \lambda V_{ii} + (1 - \lambda)t_i & \text{for any tree tip } i \end{cases}$$

245 where  $\mathbf{V} = \mathbf{V}(1)$  is the variance of the BM process on the non-transformed network.

246 On a tree, we have  $V(\lambda)_{ii} = t_i$  for any tip  $i$  and any  $\lambda$ , so that the diagonal terms  
247 remain unchanged. This is not true on a network, however, as the Pagel transformation

248 erases the variance-reduction effect of ancestral hybridizations.

249 Other transformations, for instance based on Pagel's  $\kappa$  or  $\delta$  (Pagel 1999), could be  
250 adapted to the phylogenetic network setting. Although these are not implemented for the  
251 moment, they would be straightforward to add in our linear regression framework.

### 252 *Shifted BM and Transgressive Evolution*

253 In our BM model, we allowed for shifts on non-hybrid edges. In this section, we  
254 show how those shifts can be inferred from the linear regression framework, and how they  
255 can be used to test for ancestral transgressive evolution events. When considering shifts,  
256 we again require that all tips are tree nodes. If a tip is a hybrid node, then the network is  
257 first resolved by adding a child edge of length 0 to the hybrid, making this node an internal  
258 node. This network resolution does not affect the interpretation of the network or the  
259 variance of the BM model. It adds more flexibility to the mean vector of the BM process,  
260 because the extra edge is a tree edge on which a shift can be placed.

261 *Shift Vector.*— We first describe an efficient way to represent the shifts on the network  
262 branches in a vector format. In Definition 1, we forbade shifts on hybrid branches. This  
263 does not lose generality, and is just for the sake of identifiability. Indeed, a hybrid node  
264 connects to three branches, two incoming and one outgoing. A shift on any of these three  
265 branches would impact the same set of nodes (apart from the hybrid itself), and hence  
266 would produce the same data distribution at the tips. The position of a shift on these three  
267 branches is consequently not identifiable. By restricting shifts to tree branches, the  
268 combined effect of branches with the same set of descendants is identified by a shift on a

269 single (tree) edge. We can combine all shift values in a vector  $\Delta$  indexed by nodes:

$$\Delta_i = \begin{cases} \mu & \text{if } i = \rho \text{ is the root node} \\ \Delta_e & \text{if } i \text{ is a tree node with parent edge } e \\ 0 & \text{if } i \text{ is a hybrid node.} \end{cases}$$

270 Note that any tree edge  $e$  is associated to its child node  $i$  in this definition. In the  
271 following, when there is no ambiguity, we will refer indifferently to one or the other.

272 *Descendence Matrix.*— For a rooted tree, a matrix of 0/1 values where each column  
273 corresponds to a clade can fully represent the tree topology. In column  $j$ , entries are equal  
274 to 1 for descendants of node number  $j$ , and 0 otherwise (Ho and Ané 2014; Bastide et al.  
275 2017b). On a network, a node  $i$  can be a “partial” descendant of  $j$ , with the proportion of  
276 inherited genetic material represented by the inheritance probabilities  $\gamma_e$ . Hence, the  
277 descendence matrix of a network can be defined with non-binary entries between 0 and 1 as  
278 follows.

279 **Definition 3** (Descendence Matrix). The descendence matrix  $\mathbf{U}$  of a network, given some  
280 ordering of its  $n$  tips and  $m$  internal nodes, is defined as an  $(n + m) \times (n + m)$  matrix by:

$$U_{ij} = \sum_{p \in \mathcal{P}_{j \rightarrow i}} \prod_{e \in p} \gamma_e$$

281 where  $\mathcal{P}_{j \rightarrow i}$  is the set of all the paths going from node  $j$  to node  $i$  (respecting the direction  
282 of edges). Note that, if  $i$  is not a descendant of  $j$ , then  $\mathcal{P}_{j \rightarrow i}$  is empty and  $U_{ij} = 0$ . By  
283 convention, if  $i = j$ , we take  $U_{ii} = 1$  (that is, a node is considered to be a descendant of  
284 itself). If the network is a tree, we recover the usual definition (all the  $\gamma_e$  are equal to 1).  
285 In general, the set of nodes  $i$  for which  $U_{ij} > 0$  is the hardwired cluster of  $i$ , or the clade  
286 below  $i$  if the network is a tree.

287 Further define  $\mathbf{T}$  as the (non-square) submatrix of  $\mathbf{U}$  made of the rows that correspond to  
 288 tip nodes (see example below).

289 *Example 1* (Descendence Matrix and Shift Vector). The descendence matrices  $\mathbf{U}$  and  $\mathbf{T}$   
 290 associated with the network presented in Figure 2 are shown below, with zeros replaced by  
 291 dots to improve readability:

$$\mathbf{U} = \begin{array}{c} X_1 \\ X_2 \\ X_3 \\ X_4 \\ X_5 \\ X_6 \\ X_7 \\ X_8 \\ X_9 \\ X_{10} \\ X_{11} \\ X_{12} \\ X_{13} \end{array} \begin{array}{cccccccccccccc} X_1 & X_2 & X_3 & X_4 & X_5 & X_6 & X_7 & X_8 & X_9 & X_{10} & X_{11} & X_{12} & X_{13} \\ \left( \begin{array}{cccccccccccccc} 1 & \cdot \\ 1 & 1 & \cdot \\ 1 & 1 & 1 & \cdot \\ 1 & \cdot & \cdot & 1 & \cdot \\ 1 & 1 & \cdot & \cdot & 1 & \cdot \\ 1 & \gamma_{6a} & \cdot & \gamma_{6b} & \gamma_{6a} & 1 & \cdot \\ 1 & \cdot & \cdot & 1 & \cdot & \cdot & 1 & \cdot & \cdot & \cdot & \cdot & \cdot & \cdot \\ \hline 1 & \cdot & \cdot & 1 & \cdot & \cdot & 1 & 1 & \cdot & \cdot & \cdot & \cdot & \cdot \\ 1 & \cdot & \cdot & 1 & \cdot & \cdot & 1 & \cdot & 1 & \cdot & \cdot & \cdot & \cdot \\ 1 & \gamma_{6a} & \cdot & \gamma_{6b} & \gamma_{6a} & 1 & \cdot & \cdot & \cdot & \cdot & 1 & \cdot & \cdot \\ 1 & 1 & \cdot & \cdot & 1 & \cdot & \cdot & \cdot & \cdot & \cdot & \cdot & 1 & \cdot \\ 1 & 1 & 1 & \cdot & 1 \\ 1 & 1 & 1 & \cdot & 1 \end{array} \right) \end{array} \left. \vphantom{\begin{array}{c} X_1 \\ X_2 \\ X_3 \\ X_4 \\ X_5 \\ X_6 \\ X_7 \\ X_8 \\ X_9 \\ X_{10} \\ X_{11} \\ X_{12} \\ X_{13} \end{array}} \right\} \mathbf{T}$$

292 The associated shift vector and associated trait means at the tips are shown below, where  
 293 the only non-zero shift is assumed to correspond to transgressive evolution at the

294 hybridization event, captured by  $\Delta_{10}$  on edge 10:

$$\Delta = \begin{matrix} 1 \\ 2 \\ 3 \\ 4 \\ 5 \\ 6 \\ 7 \\ 8 \\ 9 \\ 10 \\ 11 \\ 12 \\ 13 \end{matrix} \begin{pmatrix} \mu \\ \cdot \\ \Delta_{10} \\ \cdot \\ \cdot \\ \cdot \end{pmatrix} \quad \mathbf{T}\Delta = \begin{matrix} 8 \\ 9 \\ 10 \\ 11 \\ 12 \\ 13 \end{matrix} \begin{pmatrix} \mu \\ \mu \\ \mu + \Delta_{10} \\ \mu \\ \mu \\ \mu \end{pmatrix}$$

295 Note that rapid trait evolution or jumps in the trait value in other parts of the phylogeny  
 296 could be also be modeled, by letting  $\Delta_i$  be non-zero for other tree edges  $i$ .

297 *Linear Model.*— The shifted BM model in Definition 1 can be expressed by:

$$\mathbf{Y} = \mathbf{T}\Delta + \sigma^2\mathbf{E} \quad \text{with} \quad \mathbf{E} \sim \mathcal{N}(\mathbf{0}_n, \mathbf{V}^{\text{tip}}) \quad (7)$$

298 where  $\mathbf{Y}$  is the trait vector at the tips, and  $\Delta$  and  $\mathbf{T}$  are the shift vector and the  
 299 descendance matrix as defined above (see the Appendix for the proof).

300 *Transgressive Evolution.*— Even though the linear formulation above makes it easier to



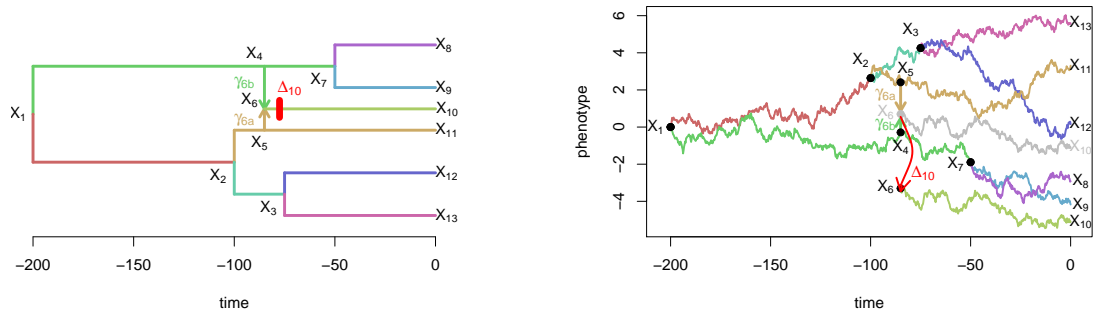

(a) A phylogenetic network with transgressive evolution

(b) BM on the branches of the network

Figure 2: Realization of a univariate BM process (with  $\mu = 0$  and  $\sigma^2 = 0.04$ ) on a calibrated network, with transgressive evolution. The shift occurs right after the hybridization event, and changes the trajectory of the BM from the grey one to the colored one.

301 study, the problem of locating the non-zero shifts on the branches of a phylogenetic tree is  
 302 difficult, and is still an active research area (see e.g. Uyeda and Harmon 2014; Bastide  
 303 et al. 2017b; Khabbazian et al. 2016; Bastide et al. 2017a).

304 On networks as on trees, a shift can represent various biological processes. In the  
 305 present work, we limit our study to shifts occurring on branches that are outgoing from a  
 306 hybrid node (see Figure 2 for an example). Such shifts might represent a *transgressive*  
 307 *evolution* effect, as defined in the introduction, and as a component of hybridization: the  
 308 new species inherits its trait as a weighted average of the traits of its two parents, plus a  
 309 shift representing extra variation, perhaps as a result of rapid selection.

310 Limiting shifts to being right after reticulations avoids the difficult exploration of all  
 311 the possible locations of an unknown number of shifts on all the tree branches.

### 312 *Statistical Tests for Transgressive Evolution*

313 As there are typically only a few hybridization events in a phylogenetic network, we can  
 314 test for transgressive evolution on each one individually. Thanks to the linear framework

315 described above, this amounts to a well-known test of fixed effects.

316 *Statistical Model.*— Denote by  $\mathbf{N}$  the  $n \times h$  sub-matrix of  $\mathbf{T}$  containing only the columns  
317 corresponding to tree branches outgoing from hybrid nodes. We assume that  $\mathbf{N}$  has full  
318 rank, that is, that the transgressive evolution shifts are identifiable. This is likely to be the  
319 case in networks that can be inferred by current methods, which typically have a small  
320 number of reticulations. We further denote by  $\bar{\mathbf{N}}$  the vector of size  $n$  containing the row  
321 sums of  $\mathbf{N}$ : for tip  $i$ ,  $\bar{N}_i = \sum_{k=1}^h N_{ik}$ . Then the phylogenetic linear regression extending (5)  
322 with transgressive evolution can be written as:

$$\mathbf{Y} = \mathbf{R}\boldsymbol{\beta} + \bar{\mathbf{N}}b + \mathbf{N}\mathbf{d} + \mathbf{E}, \quad \mathbf{d} \text{ such that } \sum_{k=1}^h d_k = 0, \quad \mathbf{E} \sim \mathcal{N}(\mathbf{0}, \sigma^2 \mathbf{V}^{\text{tip}}) \quad (8)$$

323 where  $\mathbf{R}$  is a given matrix of regressors, with associated coefficients  $\boldsymbol{\beta}$ . These are included  
324 for the sake of generality, but usually only represent the ancestral state of the BM:  $\mathbf{R} = \mathbf{1}_n$   
325 and  $\boldsymbol{\beta} = \mu$ . The coefficient  $b$  represents a *common* transgressive evolution effect, that  
326 would affect all the hybridization events uniformly, while the vector  $\mathbf{d}$  has  $h$  entries with a  
327 specific deviation from this common effect for each event, and represents *heterogeneity*.

328 *Fisher Test.*— When written this way, the problem of testing for transgressive evolution  
329 just amounts to testing the fixed effects  $b$  and  $\mathbf{d}$ . Some hypotheses that can be tested are  
330 summarized in the next table.  $\mathcal{H}_0$  corresponds to the null model where the hybrids inherit  
331 their parents' weighted average.  $\mathcal{H}_1$  is a model where all hybridization events share the  
332 same transgressive evolution effect, the trait being shifted by a common coefficient  $b$ .  
333 Finally,  $\mathcal{H}_2$  is a model where each hybridization event  $k$  has its own transgressive evolution  
334 effect, with a shift  $b + d_k$ .

|     | Hypotheses                                            | Linear Model                                |
|-----|-------------------------------------------------------|---------------------------------------------|
| 335 | $\mathcal{H}_0$ No transgressive evolution            | $b = 0$ and $\mathbf{d} = \mathbf{0}$       |
|     | $\mathcal{H}_1$ Single effect transgressive evolution | $b \neq 0$ and $\mathbf{d} = \mathbf{0}$    |
|     | $\mathcal{H}_2$ Multi effect transgressive evolution  | $b \neq 0$ and $\mathbf{d} \neq \mathbf{0}$ |

336 Tests of fixed effects are very classic in the statistics literature (see e.g. Lehman  
337 1986; Searle 1987). Compared to a likelihood ratio test, an F-test is exact and is more  
338 powerful, when available. Here we can define two F (Fisher) statistics  $F_{10}$  and  $F_{21}$  (see the  
339 Appendix). To see if  $\mathcal{H}_2$  fits the data significantly better than  $\mathcal{H}_1$ , we compare  $F_{21}$  to an F  
340 distribution with degrees of freedom  $r_{[\mathbf{R} \ \mathbf{N}]} - r_{[\mathbf{R} \ \bar{\mathbf{N}}]}$  and  $n - r_{[\mathbf{R} \ \mathbf{N}]}$ , where  $r$  is the matrix  
341 rank, and  $[\mathbf{R} \ \mathbf{N}]$  is the matrix obtained by pasting the columns of  $\mathbf{R}$  and  $\mathbf{N}$  together. To  
342 test  $\mathcal{H}_1$  versus the null model  $\mathcal{H}_0$ , we compare  $F_{10}$  to an F distribution with degrees of  
343 freedom  $r_{[\mathbf{R} \ \bar{\mathbf{N}}]} - r_{\mathbf{R}}$  and  $n - r_{[\mathbf{R} \ \bar{\mathbf{N}]}$ . We study these tests for several symmetric networks in  
344 the following section.

## 345 SIMULATION AND POWER STUDY

346 In this section, we first analyse the performance of the PCM tools described above, and  
347 then provide a theoretical power study of our statistical tests for transgressive evolution.

### 348 *Implementation of the Network PCMs*

349 All the tools described above, as well as simulation tools, were implemented in the  
350 julia package PhyloNetworks (Solís-Lemus et al. 2017). To perform a phylogenetic regression,  
351 the main function is `phyloNetworklm`. It relies on functions `preorder!` and `sharedPathMatrix`  
352 to efficiently compute the variance matrix using the algorithm in Proposition 1, and on  
353 julia package GLM (Bates 2016) for the linear regression. All the analysis and extraction  
354 tools provided by this GLM package can hence be used, including the `fctest` function to

355 perform the Fisher statistical tests for transgressive evolution. For the *Xiphophorus* fishes  
356 study (see below), we developed function `calibrateFromPairwiseDistances!` to calibrate a  
357 network topology based on pairwise genetic distances.

## 358 *Simulation Study*

359 *Setting.*— We considered 4 network topologies, all based on the same symmetric backbone  
360 tree with unit height and 32 tips, to which we added several hybridization events (Fig. 3,  
361 top). Those events were either taken very recent and numerous ( $h = 8$  events each affecting  
362 1 taxon) or quite ancient and scarce ( $h = 2$  events each affecting 4 taxa). All networks had  
363 8 tips with a hybrid ancestry. All the hybridization events had inheritance probability  
364  $\gamma = 0.3$ . We then simulated datasets on these networks with  $\mu = 0$ ,  $\sigma^2 = 1$ , and Pagel's  $\lambda$   
365 transformation with  $\lambda$  in  $\{0, 0.25, 0.5, 0.75, 1\}$ . Recall that  $\lambda = 0$  corresponds to all tips  
366 being independent, and  $\lambda = 1$  is the simple BM on the original network. Each simulation  
367 scenario was replicated 500 times. To study the scalability of the implementation, we then  
368 reproduced these analysis on networks with 32 to 256 tips, and 1 to 8 hybridization events,  
369 each affecting 8 tips.

370 We analysed each dataset assuming either a BM or a  $\lambda$  model of evolution. When  
371  $\lambda \neq 1$ , we could study the effect of wrongly using the BM. All the analyses were conducted  
372 on a laptop computer, with four Intel Core i7-6600U, and a 2.60GHz CPU speed.

373 *Results.*— When the vanilla BM model is used for both the simulation and the inference,  
374 the two parameters  $\mu$  and  $\sigma^2$  are well estimated, with no bias, for all the network  
375 topologies tested (Fig. 3, last two rows, red boxes for  $\lambda = 1$ ). The estimation of  $\mu$  is quite  
376 robust to the misspecification of the model, while  $\sigma^2$  tends to be over-estimated (Fig. 3,  
377 last two rows, red boxes for  $\lambda \neq 1$ ). This is expected, as in this case, the BM model  
378 wrongly tries to impose a strong correlation phylogenetic structure on the data, and can

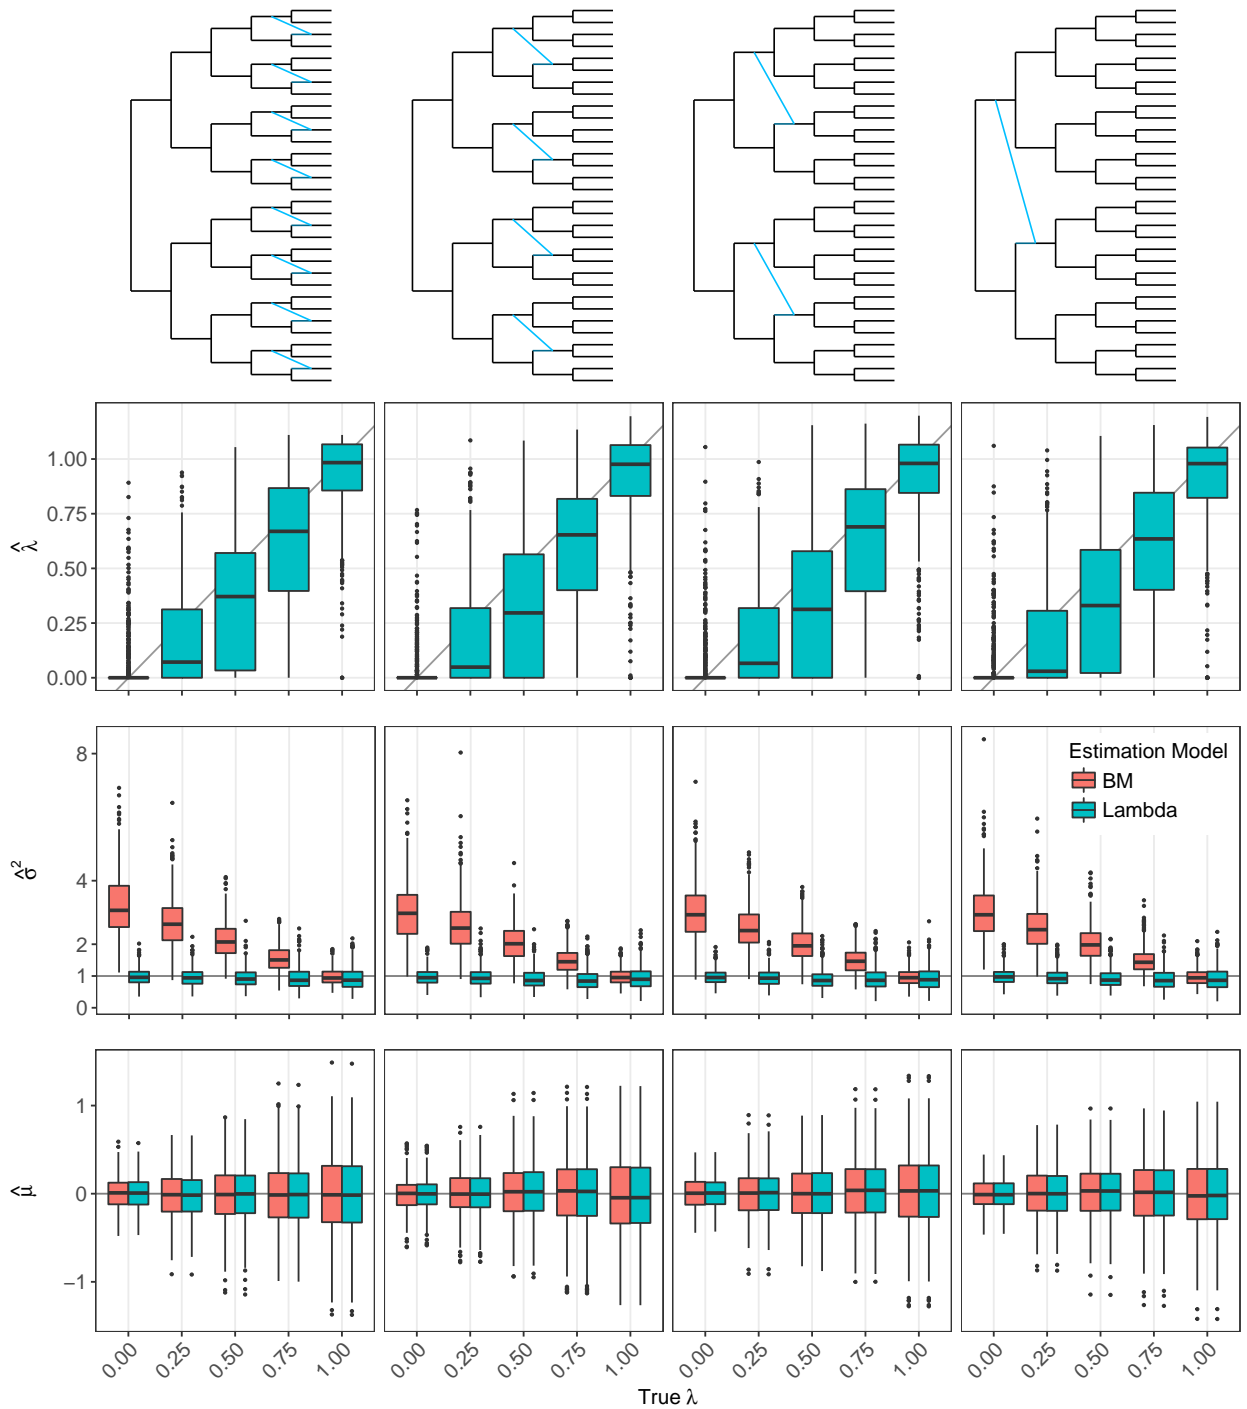

Figure 3: Estimated  $\lambda$ ,  $\sigma^2$  and  $\mu$  values for several network topologies, with  $\gamma = 0.3$ , when the data are simulated according to a BM process with Pagel's  $\lambda$  transformation. Data were analyzed either with a straight BM model, which corresponds to  $\lambda = 1$  (red), or with Pagel's  $\lambda$  transformed model (blue). True values are marked by a grey line. Boxplots show variation across 500 replicates.

379 only account for the observed diversity by raising the estimated variance, to accommodate  
 380 both phylogenetic variance and independent intra-specific variation. When we use the true  
 381  $\lambda$  model for the inference, this bias is corrected, and both  $\mu$  and  $\sigma^2$  are correctly estimated  
 382 (Fig. 3, last two rows, blue boxes). Furthermore, the  $\lambda$  estimate has a small bias but rather  
 383 high variance (Fig. 3, second row). As expected, when the number of taxa increases, this  
 384 variance decreases (data not shown). Finally, our implementation is quite fast (Fig. 4),  
 385 with computing times ranging between 1 and 10 ms for a BM fit, and between 10 ms and  
 386 1 s for a Pagel's  $\lambda$  fit.

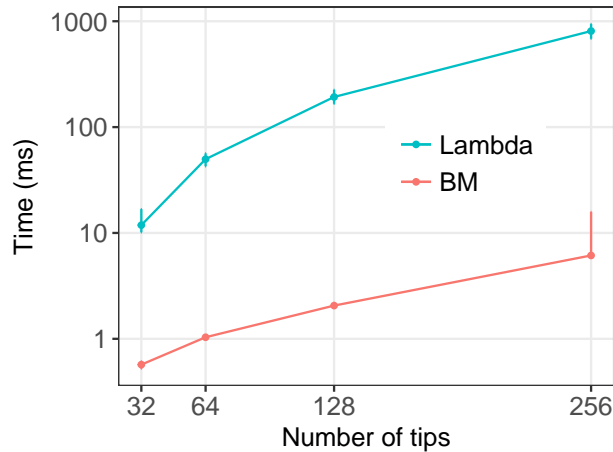

Figure 4: Computing time needed for fitting a continuous trait evolution model in *PhyloNetworks*. Median and confidence interval for 6000 repetitions in various conditions for each number of taxa. A log scale is used for the computing time.

### 387 *Power Study of the Statistical Tests for Transgressive Evolution*

388 We determined that our test statistics have the following noncentral Fisher distributions:

$$\text{Under } \mathcal{H}_1, F_{10} \sim \mathcal{F} \left( r_{[\mathbf{R} \bar{\mathbf{N}}]} - r_{\mathbf{R}}, n - r_{[\mathbf{R} \bar{\mathbf{N}}]}, \frac{b^2}{2\sigma^2} \Delta_{10}^2(\mathbf{R}, \bar{\mathbf{N}}, \mathbf{V}^{\text{tip}}) \right) \quad (9)$$

$$\text{Under } \mathcal{H}_2, F_{21} \sim \mathcal{F} \left( r_{[\mathbf{R} \mathbf{N}]} - r_{[\mathbf{R} \bar{\mathbf{N}}]}, n - r_{[\mathbf{R} \mathbf{N}]}, \frac{1}{2\sigma^2} \Delta_{21}^2(\mathbf{d}, \mathbf{R}, \bar{\mathbf{N}}, \mathbf{N}, \mathbf{V}^{\text{tip}}) \right) \quad (10)$$

389 The noncentral coefficient are determined by  $\Delta_{10}$  and  $\Delta_{21}$ , detailed in the Appendix. These  
390  $\Delta$  terms are zero under the null hypothesis ( $\mathcal{H}_0$  for  $\Delta_{10}$  and  $\mathcal{H}_1$  for  $\Delta_{21}$ ), and depend on the  
391 network topology through the metric defined by  $\mathbf{V}^{\text{tip}}$ , and through the regression matrix  $\mathbf{N}$ .

392 Because we know the exact distribution of our F statistics, we do not need to resort  
393 to simulations to assess the power of these tests. In the following, we present a theoretical  
394 power study.

395 *Test  $\mathcal{H}_0$  vs  $\mathcal{H}_1$ .*— We first studied the theoretical power to detect a single transgressive  
396 evolution effect, depending on the size  $b$  of this effect, and on the position of the  
397 hybridization event on the network. We considered 4 network topologies, using the same  
398 backbone tree than in the simulation study above, but adding only one hybridization event,  
399 occurring at various depths, from a very recent event affecting a single taxon to a very  
400 ancient event affecting 8 taxa (Fig. 5, top). The inheritance probability of this added  
401 hybrid branch was fixed to  $\gamma = 0.4$ . This parameter proved to have little influence to  
402 detect transgressive evolution (data not shown), for all the values tested, between 0 and  
403 0.5. The underlying BM process had fixed ancestral value  $\mu = 0$ , and variance rate  $\sigma^2 = 1$ .  
404 Finally, for each network topology, we varied the transgressive evolution effect from 0 to 5,  
405 and computed the power of the test  $\mathcal{H}_0$  vs  $\mathcal{H}_1$  for three fixed standard levels ( $\alpha$  in  
406  $\{0.01, 0.05, 0.1\}$ ).

407 As expected, the power improves with the size of the effect, reaching approximately  
408 1 for  $b = 5$  in all scenarios (Fig. 5, bottom). In addition, the transgressive evolution effect  
409 seems easier to detect for *recent* hybridization events, even if they affect fewer tips. One  
410 intuition for that is that ancient hybridization effects are “diluted” by the variance of the  
411 BM, and are hence harder to detect, even if they affect more tips. This may be similar to  
412 the difficulty of detecting ancient hybridization compared to recent hybridizations.

413 *Test  $\mathcal{H}_1$  vs  $\mathcal{H}_2$ .*— We used a similar framework to study the power of the test to detect

414 heterogeneity in the transgressive evolution effects. We used here the same 4 networks than  
415 in the simulation study, with 32 tips and 2 to 8 hybridization events (Fig. 6, top), but with  
416 inheritance probabilities fixed to  $\gamma = 0.4$ . Transgressive evolution effects were set to  
417  $\mathbf{d} = d\mathbf{d}^u$ , with  $\mathbf{d}^u$  fixed to  $d_i^u = 1$  for  $i \leq h/2$  and  $d_i^u = -1$  for  $i > h/2$ ,  $h$  being the number  
418 of hybrids, which was even in all the scenarios we considered. Note that the average  
419 transgressive evolution effect was 0, because the  $d_i^u$  values sum up to 0. This allowed us to  
420 reduce the “strength of heterogeneity” to a single parameter  $d$ , which we varied between 0  
421 and 5 (see appendices for the reduced expression of the noncentral coefficient). Like before,  
422 we computed the power of the test  $\mathcal{H}_1$  vs  $\mathcal{H}_2$  for three fixed standard levels ( $\alpha$  in  
423  $\{0.01, 0.05, 0.1\}$ ).

424 Figure 6 (bottom) shows a similar pattern: the test is more powerful for a high  
425 heterogeneity coefficient, and for recent hybridization events. For variation of about 3.5 in  
426 transgressive evolution, the power is close to one in all the scenarios considered here.

## 427 *Xiphophorus* FISHES

### 428 *Methods*

429 *Network inference.*— We revisited the example in Solís-Lemus and Ané (2016) and  
430 re-analyzed transcriptome data from Cui et al. (2013) to reconstruct the evolutionary  
431 history of 23 swordtails and platyfishes (*Xiphophorus*: Poeciliidae). The original work  
432 included 24 taxa, but we eliminated *X. nezahualcoyotl*, because the individual sequenced in  
433 Cui et al. (2013) was found to be a lab hybrid not representative of the wild species *X.*  
434 *nezahualcoyotl* (personal communication). We re-analyzed their first set of 1183  
435 transcripts, and BUCKy (Larget et al. 2010) was performed on each of the 8,855 4-taxon



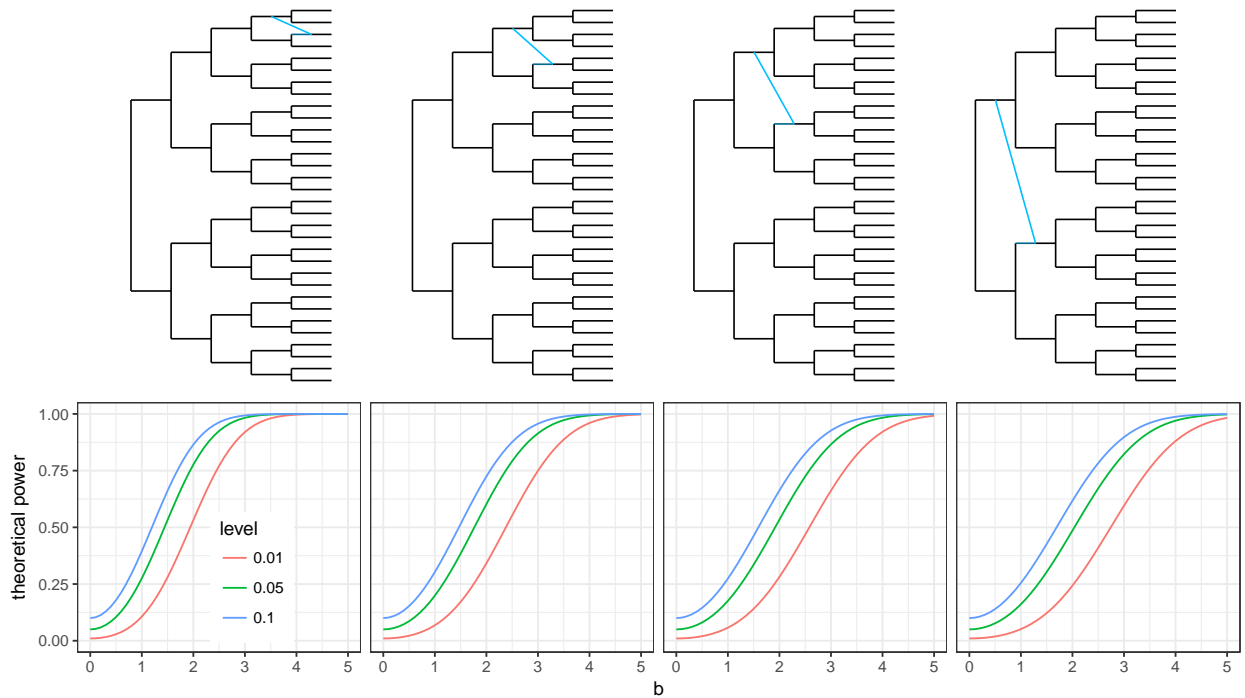

Figure 5: Theoretical power of the shared transgressive evolution test  $\mathcal{H}_0$  vs  $\mathcal{H}_1$ , for four different networks topologies with inheritance probability  $\gamma = 0.4$  (top), and a BM with ancestral value  $\mu = 0$  and variance rate  $\sigma^2 = 1$ . The power of the test increases with the transgressive evolution effect  $b$  (bottom).

436 sets. The resulting quartet CFs were used in SNaQ (Solís-Lemus and Ané 2016), using  
437  $h = 0$  to  $h = 5$  and 10 runs each. The network scores (negative log-pseudolikelihood)  
438 decreased very sharply from  $h = 0$  to 1, strongly between  $h = 1$  to 3, then decreased only  
439 slightly and somewhat linearly beyond  $h = 3$  (Fig. 7, top left). Using a broken stick  
440 heuristic, one might suggest that  $h = 1$  or perhaps  $h = 3$  best fits the data. Given our  
441 focus on PCMs, we used both networks ( $h = 1$  and 3) as well as the tree ( $h = 0$ ) to study  
442 trait evolution, and to compare results across the different choices of reticulation numbers.

443 *Network calibration.*— SNaQ estimates branch lengths in coalescent units, which are not  
444 expected to be proportional to time, and are also not estimable for some edges (like

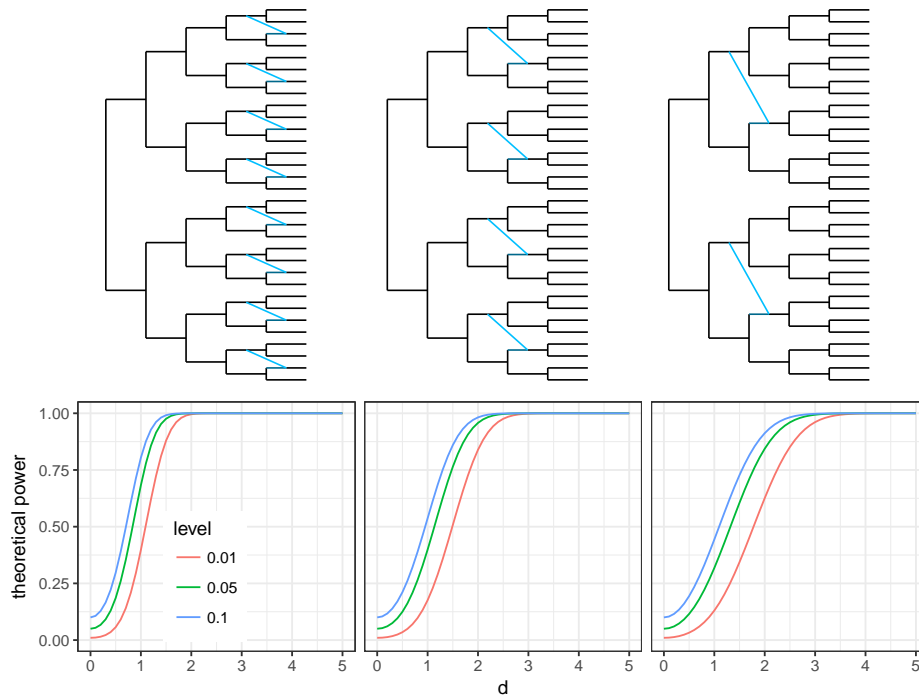

Figure 6: Theoretical power of the test for heterogeneous transgressive evolution  $\mathcal{H}_1$  vs  $\mathcal{H}_2$ , for three different networks topologies with inheritance probability  $\gamma = 0.4$  (top), and a BM with ancestral value  $\mu = 0$  and variance  $\sigma^2 = 1$ . The power of the test increases with the heterogeneity coefficient  $d$  (bottom).

445 external branches to taxa represented by a single individual). To calibrate the network, we  
446 estimated pairwise genetic distances between taxa, and then optimized node divergence  
447 times using a least-square criterion, as detailed below.

448 To estimate pairwise distances, individual gene trees were estimated with RAxML,  
449 using the HKY model and gamma-distributed rate variation among sites. For each locus,  
450 branch lengths were rescaled to a median of 1 to reduce rate variation across loci, before  
451 obtaining a pairwise distance matrix from each rescaled gene tree. Loci with one or more  
452 missing taxon were then excluded (leaving 1019 loci), and pairwise distance matrices were  
453 averaged across loci.

454 This average pairwise distance matrix was used to estimate node ages on each

455 network ( $h = 0, 1, 3$ ). The network pairwise distance between taxa  $i$  and  $j$  was taken as the  
456 weighted average distance between  $i$  and  $j$  on the trees displayed by the network, where  
457 the weight of a displayed tree is the product of the inheritance probabilities  $\gamma_e$  for all edges  
458  $e$  retained in the tree. We estimated node ages that minimized the ordinary least-squares  
459 mismatch between the genetic pairwise distances and the network pairwise distances.

460 *Traits.*— With data presented in Cui et al. (2013) and following their study on sword  
461 evolution, we revisited the hypotheses that females have a preference for males with longer  
462 swords, and that the common ancestor of the genus *Xiphophorus* likely had a sword.  
463 Rather than using the methods of parsimony character mapping and independent contrasts  
464 as in Cui et al. (2013), we tested the effect of hybridization on the ancestral state  
465 reconstructions and the correlation between both traits using networks with zero, one or  
466 three hybridization events, using `phyloNetworklm`. For each network, the topology and  
467 branch lengths were assumed to be perfectly estimated, and fixed. We also tested for  
468 phylogenetic signal in both traits on all networks using Pagel's  $\lambda$ , as well as for  
469 transgressive evolution, using the  $F$  statistics defined above. For the phylogenetic  
470 regression, more than half of the species were excluded because they lack information on  
471 female preference.

472 Along with the datasets used, two executables `julia markdown (.jmd)` files are  
473 provided in the online supplementary material, allowing the interested reader to reproduce  
474 all the analyses described here.

## 475 *Results*

476 The *Xiphophorus* fish topologies with zero, one, and three hybridization events were  
477 calibrated using pairwise genetic distances (Fig. 7, bottom, for  $h = 0$  and 3). With  $h = 1$ ,  
478 the reticulation event did not necessarily imply the existence of unsampled or extinct taxa,

479 so we constrained this reticulation to occur between contemporary populations (with an  
480 edge length of 0). For the network with  $h = 3$ , two reticulation events implied the existence  
481 of unsampled taxa, so we calibrated this network without constraint, to allow minor  
482 reticulation edges of positive lengths. Optimized branch lengths were similar between  
483 networks. Branch lengths were estimated to be 0 for some tree edges and some  
484 unconstrained hybrid edges, creating polytomies.

485       Using networks with 0, 1 or 3 hybridization events, we found a positive correlation  
486 between female preference and longer swords in males, but this relationship was not  
487 statistically significant ( $h = 0$ :  $p = 0.096$ ;  $h = 1$ :  $p = 0.110$ ;  $h = 3$ :  $p = 0.106$ ). Ancestral  
488 state reconstruction of sword index shows the presence of a sword at the MRCA of each  
489 network because unsworded species were assigned a value of 0.275 in Cui et al. (2013) and  
490 the ancestral state in all networks was reconstructed to be 0.46. Phylogenetic signal was  
491 high for both traits with estimated  $\lambda = 1.0$  on all networks (or above 1.0 with  
492 unconstrained maximum likelihood).

493       We also applied our tests for transgressive evolution on both traits, using the  
494 network with 3 hybridization events (Fig. 7, lower right). For the sword index, we found no  
495 evidence of transgressive evolution ( $p = 0.55$  and  $p = 0.28$ , respectively, for homogeneous or  
496 heterogeneous transgressive evolution). However, we did find some evidence for an  
497 heterogeneous transgressive evolution effect for female preference. Testing  $\mathcal{H}_2$  against  $\mathcal{H}_1$   
498 gives  $p = 0.0087$ . Testing  $\mathcal{H}_2$  against  $\mathcal{H}_0$  directly, we get  $p = 0.0064$  (see the Appendix for  
499 a description of this third test, also based on a Fisher statistic). However, transgressive  
500 evolution effects were in opposite directions (one positive and two negative), such that the  
501 common effect was not significantly different from 0:  $\mathcal{H}_1$  vs  $\mathcal{H}_0$  gave  $p = 0.11$ .

## DISCUSSION

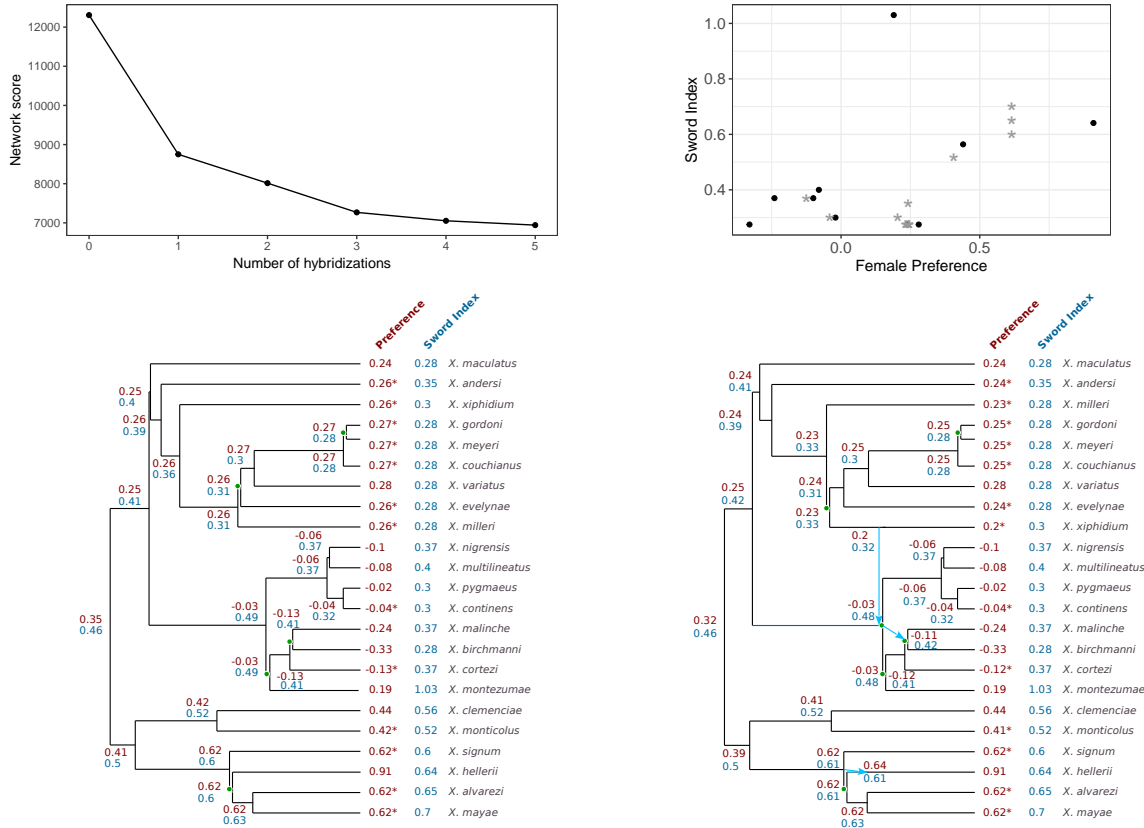

Figure 7: Results of the analysis on the fish dataset. Top left: negative pseudo log-likelihood score of the estimated networks with various numbers of hybridizations. Top right: scatter plot of sword index and female preference. Gray stars are taxa missing female preference data, for which female preference was predicted using ancestral state reconstruction of the trait on the network (independent of sword index). Bottom: ancestral state reconstruction of both traits, independently, using a BM model on the tree ( $h = 0$ , left) or on the network with  $h = 3$  (right). Starred values indicate taxa with missing preference data, and imputed female preference values. Branches with an estimated length zero are indicated by a green dot, to show the network topologies.

503 *Impact of the Network.*— The results from the fish dataset analysis using a tree ( $h = 0$ ) or  
504 a network ( $h = 1$  or  $h = 3$ ) show that taking the hybridization events into account has a  
505 small impact on the ancestral state reconstruction and on the estimation of parameters,  
506 both for the regression analysis and for the test for phylogenetic signal. This finding was  
507 corroborated by simulations: when we ignored hybridization events, using a tree while the  
508 true underlying model was a network, we found that the estimation of parameters  $\mu$  and  $\sigma^2$   
509 was only slightly affected (data not shown). These results may indicate that major  
510 previous findings, that used a phylogenetic tree where a phylogenetic network might have  
511 been more appropriate, are likely to be robust to a violation of the tree-like ancestry  
512 assumption. Our new model may simply refine previous estimates in many cases.

513         However, the structure of the network has a strong impact on the study of  
514 transgressive evolution. This is expected, as the model allows for shifts below each inferred  
515 hybrid. If one reticulation is undetected, or if one was incorrectly located on the network,  
516 then the model will be ill-fitted, leading to potentially misleading conclusions. As an  
517 example, we reproduced the analysis of transgressive evolution for female preference on the  
518 network with three hybridization events, but this time pruning the network, to keep only  
519 the taxa with a measured trait. Preference data were missing for species *X. signum*, *X.*  
520 *alvarezi* and *X. mayae*, such that *X. helleri* became the only species impacted by one of  
521 the reticulation event, which became a simple loop in the network. In other words, *X.*  
522 *helleri* was the only descendant of the reticulation, and also the closest relative of the  
523 hybrid's parent among the remaining taxa. The reticulation could be dropped from the  
524 pruned network. This new and simplified network only retained the two hybridization  
525 events associated with negative shifts. As a consequence, and contrary to the conclusion we  
526 found in the main text, we found support for *homogeneous* transgressive evolution  
527 ( $p = 0.0071$  for  $\mathcal{H}_1$  vs  $\mathcal{H}_0$ ), and no support for heterogeneous effects ( $p = 0.88$  for  $\mathcal{H}_1$  vs  
528  $\mathcal{H}_0$ ). This illustrates that caution is needed for the interpretation of tests of transgressive

529 evolution, as those highly depend on the quality of the input network inference, which is a  
530 recognized hard problem.

531 *Network Calibration.*— To conduct PCMs, we developed a distance-based method to  
532 calibrate a network topology into a time-consistent network. This is a basic method that  
533 makes a molecular clock assumption on the input pairwise distance matrix. Important  
534 improvements could be made to account for rate variation across lineages, and to use  
535 calibration dates from fossil data, like in relaxed clock calibration methods for phylogenetic  
536 trees such as r8s (Sanderson 2003) or BEAST (Drummond et al. 2006). In our fish  
537 example, we averaged pairwise distances across loci, to mitigate a violation of the  
538 molecular clock that might be specific to each locus.

539 Our method estimated some branch lengths to be 0, thereby creating polytomies.  
540 This behavior is shared by other well-tested distance-based methods like Neighbor-Joining  
541 (Saitou and Nei 1987), which can also estimate 0 or even negative branch lengths.

542 We also noticed that several calibrations could fit the same matrix of genetic  
543 pairwise distances equally well, pointing to a lack of identifiability of some node ages. This  
544 issue occurred for the age of hybrid nodes and of their parent nodes. Branch lengths and  
545 node ages around reticulation points were also found to be non-identifiable by Pardi and  
546 Scornavacca (2015), when the input data consist of the full set of trees displayed by the  
547 network, and when these trees are calibrated. This information on gene trees can only  
548 identify the "unzipped" version of the network, where unzipping a reticulation means  
549 moving the hybrid point as close as possible to its child node (see Pardi and Scornavacca  
550 2015, for a rigorous description of "canonical" networks). This unzipping operation creates  
551 a polytomy after the reticulation point. We observed such polytomies for two events in our  
552 calibrated network (Fig. 7, bottom right). Pardi and Scornavacca (2015) proved that the  
553 lack of identifiability is worse for time-consistent networks, which violates their "NELP"

554 property (no equally-long paths). Lack of identifiable branch lengths around reticulations  
555 is thus observed from different sources of input data, and requires more study. Methods  
556 utilizing multiple sources of data might be able to resolve the issue. For instance, gene tree  
557 discordance is informative about branch lengths in coalescent units around reticulation  
558 nodes, and could rescue the lack of information from other input data like pairwise  
559 distances or calibrated displayed trees. More work is also needed to study the robustness of  
560 transgressive evolution tests to errors in estimated branch lengths.

561 *Comparison with Jhvueng and O'Meara (2017).*— In their model, Jhvueng and O'Meara  
562 (2017) include hybridization events as *random* shifts. Using their notations, each hybrid  $k$   
563 shifts by a coefficient  $\log \beta + \delta_k$ , with  $\delta_k$  a random Gaussian with variance  $\nu_H$ :  
564  $\delta_k \sim \mathcal{N}(0, \nu_H)$ . This formulation provides a *mixed effects* linear model, with shifts  
565 appearing as random effects. In this framework, the test of heterogeneity ( $\mathcal{H}_2$  vs  $\mathcal{H}_1$ )  
566 amounts to a test of null variance,  $\nu_H = 0$ . In the context of mixed effects linear models,  
567 such tests are also well studied, but are known to be more difficult than tests of fixed  
568 effects (Lehman 1986; Khuri et al. 1998). Assuming that the variance  $\nu_H$  is 0, our test for a  
569 common transgressive evolution effect ( $\mathcal{H}_1$  vs  $\mathcal{H}_0$ ) is then similar to the likelihood-based  
570 test for  $\log \beta = 0$  in Jhvueng and O'Meara (2017). A mixed-effect model is legitimate,  
571 although it might be more difficult to study theoretically, and its inference can be more  
572 tricky. Jhvueng and O'Meara (2017) indeed report some numerical problems, and rather  
573 large sampling error for both  $\log \beta$  and  $\nu_H$ . Current state-of-the-art methods to infer  
574 phylogenetic networks cannot handle more than 30 taxa and no more than a handful of  
575 reticulation events (Hejase and Liu 2016). Hence, it might not be surprising that  
576 estimating a variance  $\nu_H$  for an event that is only observed two or three times is indeed  
577 difficult. On data sets with few reticulations, we believe that our fixed effect approach can  
578 be better suited. However, our approach adds a parameter for each hybridization event,



579 whereas the random-effect approach of Jhwueng and O’Meara (2017) maintains only two  
580 parameters (mean and variance). As the available networks are likely to grow over the next  
581 few decades, this later approach might be preferable in the future.

582 *Perspectives.*— As stated in the introduction, PCMs rely on two fundamental components:  
583 the species relationship model (tree or network), and the model of trait evolution. Here, we  
584 showed how a network could be used instead of a tree, but we used the most simple model  
585 of trait evolution (BM). Future developments could adapt some of the more refined models  
586 to the network framework, in order to capture the diverse tempo and modes of evolution.  
587 In doing so, the salient point to be careful about is the merging rule one might adopt for  
588 all these processes.

589 For instance, the Ornstein-Uhlenbeck (OU) process is popular to model trait  
590 evolution (Hansen 1997). It has extra parameters compared to the BM: a primary  
591 optimum for the trait, and  $\alpha$ , a rubber band parameter that controls how the trait is  
592 pulled toward its optimum. Either one might vary across lineages. What behavior would  
593 be biologically realistic at reticulation points? For an OU with one single optimum value  
594 over the whole tree, the weighted average merging rule could be adopted. But how should  
595 transgressive evolution be modeled? With the OU process, shifts have been traditionally  
596 considered on the optimal value rather than directly on the process’ value, as we did for the  
597 BM (Butler and King 2004; Beaulieu et al. 2012). If a transgressive evolution shift is  
598 allowed on the optimum value, this would result in several optima on different regions of  
599 the network, which might not capture biological realism. A related problem is to find a  
600 realistic merging rule for reticulations between two species evolving in two different  
601 phylogenetic groups with different optima.

602 More generally, the numerous improvements that have been developed for PCMs on  
603 trees should be adapted to phylogenetic networks, such as support for measurement error

604 or intra-specific variation (as in, e.g. Lynch 1991; Ives et al. 2007; Felsenstein 2008;  
605 Goolsby et al. 2017); distinct regimes of evolution on different regions of the network (see  
606 e.g. Beaulieu et al. 2012); and multivariate processes (Felsenstein 1985; Bartoszek et al.  
607 2012; Clavel et al. 2015).

608 Sticking with the vanilla BM, it could also be interesting to look into other merging  
609 rules at reticulation points. For instance, instead of taking a weighted average, one could  
610 draw either one of the two parents' trait for the hybrid, with probabilities defined by the  
611 weights  $\gamma_a$  and  $\gamma_b$  of the parents. If such a rule could be justified from a modelling point of  
612 view, further work would be needed to derive the induced distribution of the trait at the  
613 tips of the network.

## 614 ACKNOWLEDGMENTS

615 PB would like to thank Mahendra Mariadassou and Stéphane Robin for enlightening  
616 discussions, and useful comments on an early version of this work. PB also thanks Tristan  
617 Mary-Huard for sharing his extensive knowledge on the linear mixed model. The authors  
618 thank Mohammad Khabbazian for insights on the topological sorting algorithm.

## 619 FUNDING

620 The visit of PB to the University of Wisconsin-Madison during the fall of 2015 was  
621 funded by a grant from the Franco-American Fulbright Commission. This work was funded  
622 in part by the National Science Foundation (DEB 1354793) and by a Vilas Associate award  
623 to CA from the University of Wisconsin-Madison.

624 \*

625 References

- 626 Bartoszek K, Pienaar J, Mostad P, Andersson S, Hansen TF. 2012. A phylogenetic  
627 comparative method for studying multivariate adaptation. *Journal of Theoretical*  
628 *Biology*. 314:204–215.
- 629 Bastide P, Ané C, Robin S, Mariadassou M. 2017a. Inference of Adaptive Shifts for  
630 Multivariate Correlated Traits. *bioRxiv*. .
- 631 Bastide P, Mariadassou M, Robin S. 2017b. Detection of adaptive shifts on phylogenies by  
632 using shifted stochastic processes on a tree. *Journal of the Royal Statistical Society:*  
633 *Series B (Statistical Methodology)*. 79:1067–1093.
- 634 Bates D. 2016. Generalized linear models in Julia.  
635 <https://github.com/JuliaStats/GLM.jl>.
- 636 Beaulieu JM, Jhwueng DC, Boettiger C, O’Meara BC. 2012. Modeling stabilizing  
637 selection: Expanding the Ornstein-Uhlenbeck model of adaptive evolution. *Evolution*.  
638 66:2369–2383.
- 639 Blomberg SP. 2016. Beyond Brownian motion and the Ornstein-Uhlenbeck process:  
640 Stochastic diffusion models for the evolution of quantitative characters. *bioRxiv e-print*. .
- 641 Blomberg SP, Garland T, Ives AR. 2003. Testing for Phylogenetic Signal in Comparative  
642 Data: Behavioral Traits Are More Labile. *Evolution*. 57:717–745.
- 643 Butler MA, King AA. 2004. Phylogenetic Comparative Analysis: A Modeling Approach for  
644 Adaptive Evolution. *The American Naturalist*. 164:683–695.
- 645 Chen ZJ. 2013. Genomic and epigenetic insights into the molecular bases of heterosis.  
646 *Nature Reviews Genetics*. 14:471–482.

- 647 Clavel J, Escarguel G, Merceron G. 2015. mvMORPH: an R package for fitting  
648 multivariate evolutionary models to morphometric data. *Methods in Ecology and*  
649 *Evolution*. 6:1311–1319.
- 650 Cui R, Schumer M, Kruesi K, Walter R, Andolfatto P, Rosenthal GG. 2013.  
651 Phylogenomics reveals extensive reticulate evolution in *xiphophorus* fishes. *Evolution;*  
652 *international journal of organic evolution*. 67:2166–79.
- 653 Degnan J. 2017. Modeling hybridization with incomplete lineage sorting. *Systematic*  
654 *Biology*. p. submitted for Symposium issue.
- 655 Degnan JH, Salter LA. 2005. Gene tree distributions under the coalescent process.  
656 *Evolution; international journal of organic evolution*. 59:24–37.
- 657 Drummond AJ, Ho SYW, Phillips MJ, Rambaut A. 2006. Relaxed phylogenetics and  
658 dating with confidence. *PLOS Biology*. 4:e88.
- 659 Felsenstein J. 1985. Phylogenies and the Comparative Method. *The American Naturalist*.  
660 125:1–15.
- 661 Felsenstein J. 2004. Inferring Phylogenies. Sinauer Associates, Sunderland, Mass.
- 662 Felsenstein J. 2008. Comparative Methods with Sampling Error and WithinSpecies  
663 Variation: Contrasts Revisited and Revised. *The American Naturalist*. 171:713–725.
- 664 Fiévet JB, Dillmann C, de Vienne D. 2010. Systemic properties of metabolic networks lead  
665 to an epistasis-based model for heterosis. *Theoretical and Applied Genetics*. 120:463–473.
- 666 Goolsby EW, Bruggeman J, Ané C. 2017. Rphylopars: fast multivariate phylogenetic  
667 comparative methods for missing data and within-species variation. *Methods in Ecology*  
668 *and Evolution*. 8:22–27.

- 669 Grafen A. 1989. The Phylogenetic Regression. *Philosophical Transactions of the Royal*  
670 *Society B: Biological Sciences*. 326:119–157.
- 671 Grafen A. 1992. The uniqueness of the phylogenetic regression. *Journal of Theoretical*  
672 *Biology*. 156:405–423.
- 673 Hansen TF. 1997. Stabilizing selection and the comparative analysis of adaptation.  
674 *Evolution*. 51:1341.
- 675 Hansen TF, Martins EP. 1996. Translating between microevolutionary process and  
676 macroevolutionary patterns: The correlation structure of interspecific data. *Evolution*.  
677 50:1404.
- 678 Hejase HA, Liu KJ. 2016. A scalability study of phylogenetic network inference methods  
679 using empirical datasets and simulations involving a single reticulation. *BMC*  
680 *Bioinformatics*. 17:422.
- 681 Ho LST, Ané C. 2014. Intrinsic inference difficulties for trait evolution with  
682 Ornstein-Uhlenbeck models. *Methods in Ecology and Evolution*. 5:1133–1146.
- 683 Huson DH, Rupp R, Scornavacca C. 2010. *Phylogenetic Networks*. Cambridge: Cambridge  
684 University Press.
- 685 Ives AR, Midford PE, Garland T, Oakley T. 2007. Within-species variation and  
686 measurement error in phylogenetic comparative methods. *Systematic Biology*.  
687 56:252–270.
- 688 Jhwueng DC, O’Meara BC. 2017. Trait evolution on phylogenetic networks. *Systematic*  
689 *Biology*. p. submitted for Symposium issue.
- 690 Kahn AB. 1962. Topological sorting of large networks. *Communications of the ACM*.  
691 5:558–562.

- 692 Khabbazian M, Kriebel R, Rohe K, Ané C. 2016. Fast and accurate detection of  
693 evolutionary shifts in Ornstein-Uhlenbeck models. *Methods in Ecology and Evolution*.  
694 7:811–824.
- 695 Khuri AI, Mathew T, Sinha BK. 1998. Statistical Tests for Mixed Linear Models. Wiley  
696 series in Probabilities and Statistics.
- 697 Kubatko LS. 2009. Identifying hybridization events in the presence of coalescence via  
698 model selection. *Systematic Biology*. 58:478–488.
- 699 Landis MJ, Schraiber JG, Liang M. 2013. Phylogenetic analysis using Lévy processes:  
700 Finding jumps in the evolution of continuous traits. *Systematic Biology*. 62:193–204.
- 701 Larget B, Kotha S, Dewey C, Ané C. 2010. BUCKy: Gene tree / species tree reconciliation  
702 with Bayesian concordance analysis. *Bioinformatics*. 26:2910–2911.
- 703 Lehman EL. 1986. Testing Statistical Hypotheses. Springer Texts in Statistics. New York,  
704 NY: Springer New York.
- 705 Long C, Kubatko L. 2017. The effect of gene flow on coalescent-based species-tree  
706 inference. *Systematic Biology*. p. submitted for Symposium issue.
- 707 Lynch M. 1991. Methods for the Analysis of Comparative Data in Evolutionary Biology.  
708 *Evolution*. 45:1065–1080.
- 709 Maddison WP. 1997. Gene trees in species trees. *Systematic Biology*. 46:523.
- 710 Mallet J. 2005. Hybridization as an invasion of the genome. *Trends in Ecology &  
711 Evolution*. 20:229–237.
- 712 Mallet J. 2007. Hybrid speciation. *Nature*. 446:279–283.

- 713 Pagel M. 1999. Inferring the historical patterns of biological evolution. *Nature*.  
714 401:877–884.
- 715 Paradis E, Claude J, Strimmer K. 2004. APE: Analyses of Phylogenetics and Evolution in  
716 R language. *Bioinformatics*. 20:289–290.
- 717 Pardi F, Scornavacca C. 2015. Reconstructible phylogenetic networks: Do not distinguish  
718 the indistinguishable. *PLoS Computational Biology*. 11:e1004135.
- 719 Pennell MW, Harmon LJ. 2013. An integrative view of phylogenetic comparative methods:  
720 connections to population genetics, community ecology, and paleobiology. *Annals of the*  
721 *New York Academy of Sciences*. 1289:90–105.
- 722 Pickrell JK, Pritchard JK. 2012. Inference of population splits and mixtures from  
723 genome-wide allele frequency data. *PLoS Genetics*. 8:e1002967.
- 724 Revell LJ. 2012. phytools: An R package for phylogenetic comparative biology (and other  
725 things). *Methods in Ecology and Evolution*. 3:217–223.
- 726 Rieseberg LH, Archer Ma, Wayne RK. 1999. Transgressive segregation, adaptation and  
727 speciation. *Heredity*. 83:363–372.
- 728 Robinson GK. 1991. That BLUP is a good thing: The estimation of random effects.  
729 *Statistical Science*. 6:15–32.
- 730 Saitou N, Nei M. 1987. The neighbor-joining method: a new method for reconstructing  
731 phylogenetic trees. *Molecular Biology and Evolution*. 4:406–425.
- 732 Sanderson MJ. 2003. r8s: inferring absolute rates of molecular evolution and divergence  
733 times in the absence of a molecular clock. *Bioinformatics*. 19:301–302.

- 734 Schluter D, Price T, Mooers AØ, Ludwig D. 1997. Likelihood of ancestor states in  
735 adaptive radiation. *Evolution*. 51:1699–1711.
- 736 Searle SR. 1987. Linear Models for Unbalanced Data. Wiley Series in Probability and  
737 Statistics. Wiley.
- 738 Solís-Lemus C, Ané C. 2016. Inferring phylogenetic networks with maximum  
739 pseudolikelihood under incomplete lineage sorting. *PLoS Genetics*. 12:e1005896.
- 740 Solís-Lemus C, Bastide P, Ané C. 2017. PhyloNetworks: a package for phylogenetic  
741 networks. *Molecular Biology and Evolution*. .
- 742 Solís-Lemus C, Yang M, Ané C. 2016. Inconsistency of species tree methods under gene  
743 flow. *Systematic Biology*. 65:843–851.
- 744 Uyeda JC, Harmon LJ. 2014. A novel Bayesian method for inferring and interpreting the  
745 dynamics of adaptive landscapes from phylogenetic comparative data. *Systematic  
746 Biology*. 63:902–918.
- 747 Yu Y, Degnan JH, Nakhleh L. 2012. The probability of a gene tree topology within a  
748 phylogenetic network with applications to hybridization detection. *PLoS Genetics*.  
749 8:e1002660.
- 750 Yu Y, Dong J, Liu KJ, Nakhleh L. 2014. Maximum likelihood inference of reticulate  
751 evolutionary histories. *PNAS*. 111:16448–16453.
- 752 Yu Y, Nakhleh L. 2015. A maximum pseudo-likelihood approach for phylogenetic  
753 networks. *BMC Genomics*. 16:S10.



755 We prove here both formula (1) for the BM variance matrix and Proposition 1  
 756 giving an efficient algorithm to calculate this matrix. We do so by induction on the number  
 757 of nodes in the network:  $N = n + m$ . When the network is made of a single node  $i = 1$ ,  
 758 equation (1) and Proposition 1 are obviously correct. We now assume that these results are  
 759 correct for any phylogenetic network with up to  $N - 1$  nodes, and we consider a network  
 760 with  $N$  nodes. When these nodes are sorted in preorder, the last node  $i = N$  is necessarily  
 761 a tip (with no descendants), so removing it and its parent edges from the original network  
 762 gives a valid phylogenetic network with  $N - 1$  nodes. Using the same notations as in the  
 763 main text, we can focus on the case  $i = N$ . Because of the preorder, there is no directed  
 764 path from  $i$  to  $j$  for any  $j < i$ . We use here the formulas of Definition 1, and assume  $\sigma^2 = 1$   
 765 without loss of generality.

- 766 • If  $i$  is a tree node, then  $X_i = X_a + \epsilon$ , with  $\epsilon \sim \mathcal{N}(0, \ell_{e_a})$ ,  $\epsilon$  independent of the values  
 767  $X_j$  in the subnetwork ( $j < i$ ). Moreover,  $a < i$  because of the preorder. Then:

$$\text{Cov}[X_i; X_j] = \begin{cases} \text{Cov}[X_a; X_j] & \text{if } j < i \\ \text{Cov}[X_a; X_a] + \ell_{e_a} & \text{if } j = i \end{cases}$$

768 and all the needed quantities on the right-hand side have already been computed  
 769 because  $a < i$ . This proves (3) in Proposition 1. Next, we seek to prove (1). Note  
 770 that it is valid by induction for all nodes in the subnetwork, and we just need to  
 771 prove it for  $i = N$  and any  $j \leq i$ . By induction, we have that, for any  $j < i$ ,

$$\text{Cov}[X_a; X_j] = \sum_{\substack{p_a \in \mathcal{P}_a \\ p_j \in \mathcal{P}_j}} \left( \prod_{e \in p_a} \gamma_e \right) \left( \prod_{e \in p_j} \gamma_e \right) \sum_{e \in p_a \cap p_j} \ell_e.$$

772 Because  $a$  is the only parent of node  $i = N$ , any paths from the root to  $i$  must start  
 773 as a path from the root to  $a$ , and then follow  $e_a$  between  $a$  and  $i$ . In other words, any

774

path from the root to  $a$  corresponds to a unique path from the root to  $i$ :

$$\mathcal{P}_i = \{p_i = (p_a, e_a) : p_a \in \mathcal{P}_a\} .$$

775

Moreover, the inheritance weight of path  $p_a$  and  $p_i = (p_a, e_a)$  are the same, because  $e_a$

776

is a tree edge with  $\gamma_{e_a} = 1$ :  $\prod_{e \in p_i} \gamma_e = \prod_{e \in p_a} \gamma_e$ . Now take  $j < i$ . Any path  $p_j$  from

777

the root to  $j$  cannot go through  $i$  (because of the preorder), therefore it cannot go

778

through  $e_a$ , and the edges shared by  $p_i$  and  $p_j$  are exactly the same as the edges

779

shared by  $p_a$  and  $p_j$ . Putting these considerations together, we get:

$$\begin{aligned} \text{Cov}[X_i; X_j] &= \text{Cov}[X_a; X_j] = \sum_{\substack{p_a \in \mathcal{P}_a \\ p_j \in \mathcal{P}_j}} \left( \prod_{e \in p_a} \gamma_e \right) \left( \prod_{e \in p_j} \gamma_e \right) \sum_{e \in p_a \cap p_j} \ell_e \\ &= \sum_{\substack{p_i \in \mathcal{P}_i \\ p_j \in \mathcal{P}_j}} \left( \prod_{e \in p_i} \gamma_e \right) \left( \prod_{e \in p_j} \gamma_e \right) \sum_{e \in p_a \cap p_j} \ell_e , \end{aligned}$$

780

which proves (1) for  $i = N$  and  $j < i$ . For  $j = i$ , any path  $p_j$  from the root to  $j = i$

781

must go through  $a$  and  $e_a$ , so that the shared edges between  $p_i$  and  $p_j$  are the edges

782

shared by  $p_a$  and  $p_j$ , plus edge  $e_a$ . Therefore, we get that

$$\begin{aligned} \text{Cov}[X_i; X_i] &= \text{Cov}[X_a; X_a] + \ell_{e_a} \\ &= \sum_{\substack{p_1 \in \mathcal{P}_a \\ p_2 \in \mathcal{P}_a}} \left( \prod_{e \in p_1} \gamma_e \right) \left( \prod_{e \in p_2} \gamma_e \right) \sum_{e \in p_1 \cap p_2} \ell_e + \ell_{e_a} \\ &= \sum_{\substack{p_1 \in \mathcal{P}_i \\ p_2 \in \mathcal{P}_i}} \left( \prod_{e \in p_1} \gamma_e \right) \left( \prod_{e \in p_2} \gamma_e \right) \left( \left( \sum_{e \in p_1 \cap p_2} \ell_e \right) - \ell_{e_a} \right) + \ell_{e_a} \\ &= \sum_{\substack{p_1 \in \mathcal{P}_i \\ p_2 \in \mathcal{P}_i}} \left( \prod_{e \in p_1} \gamma_e \right) \left( \prod_{e \in p_2} \gamma_e \right) \sum_{e \in p_1 \cap p_2} \ell_e \end{aligned}$$

783 where the last equality follows from  $\sum_{p \in \mathcal{P}_i} \left( \prod_{e \in p} \right) = 1$ . This completes the proof of  
 784 (1), for  $i = j$ .

785 • If  $i$  is a hybrid node, then  $X_i = (\gamma_{e_a} X_a + \gamma_{e_b} X_b) + (\gamma_{e_a} \epsilon_a + \gamma_{e_b} \epsilon_b)$ , with  $\epsilon_k \sim \mathcal{N}(0, \ell_{e_k})$ ,  
 786 and  $\epsilon_k$  independent of the all values  $X_j$  in the subnetwork ( $j < i$ ) for  $k = a$  and  
 787  $k = b$ . Again,  $a < i$  and  $b < i$  because of the preorder. Then:

$$\text{Cov}[X_i; X_j] = \begin{cases} \gamma_{e_a} \text{Cov}[X_a; X_j] + \gamma_{e_b} \text{Cov}[X_b; X_j] & \text{if } j < i \\ \gamma_{e_a}^2 (\text{Cov}[X_a; X_a] + \ell_{e_a}) + \gamma_{e_b}^2 (\text{Cov}[X_b; X_b] + \ell_{e_b}) & \text{if } j = i. \\ + 2\gamma_{e_a} \gamma_{e_b} \text{Cov}[X_a; X_b] & \end{cases}$$

788 This proves (4) in Proposition 1. Next, we focus on proving (1). Again, it is valid by  
 789 induction for all nodes in the subnetwork, and we need to prove it for  $i = N$  and any  
 790  $j \leq i$ . By induction, (1) holds for  $a, b$ , and any  $j < i$ . Then, because  $a$  and  $b$  are the  
 791 only parents of  $i$ , any path  $p_i$  from the root to  $i$  must go through  $a$  and  $e_a$ , or  
 792 through  $b$  and  $e_b$  (and not both). In other words:

$$\mathcal{P}_i = \{(p_a, e_a) : p_a \in \mathcal{P}_a\} \cup \{(p_b, e_b) : p_b \in \mathcal{P}_b\}.$$

793 Now considering node  $j < i$  and a path  $p_j$  from the root to  $j$ ,  $p_j$  cannot go through  $i$   
 794 so it cannot go through  $e_a$  or  $e_b$ . Therefore, the shared edges between  $p_j$  and  
 795  $p_i = (p_a, e_a)$  are exactly the same edges as those shared between  $p_j$  and  $p_a$ , and the  
 796 shared edges between  $p_j$  and  $p_i = (p_b, e_b)$  are also the same as those shared between

797

$p_j$  and  $p_b$ . For  $j < i$ , we get:

$$\begin{aligned}
 & \sum_{\substack{p_i \in \mathcal{P}_i \\ p_j \in \mathcal{P}_j}} \left( \prod_{e \in p_i} \gamma_e \right) \left( \prod_{e \in p_j} \gamma_e \right) \sum_{e \in p_i \cap p_j} \ell_e \\
 &= \sum_{\substack{p_a \in \mathcal{P}_a \\ p_j \in \mathcal{P}_j}} \left( \prod_{e \in p_a} \gamma_e \right) \gamma_{e_a} \left( \prod_{e \in p_j} \gamma_e \right) \sum_{e \in p_a \cap p_j} \ell_e + \sum_{\substack{p_b \in \mathcal{P}_b \\ p_j \in \mathcal{P}_j}} \left( \prod_{e \in p_b} \gamma_e \right) \gamma_{e_b} \left( \prod_{e \in p_j} \gamma_e \right) \sum_{e \in p_b \cap p_j} \ell_e \\
 &= \gamma_{e_a} \text{Cov}[X_a; X_j] + \gamma_{e_b} \text{Cov}[X_b; X_j] && \text{by induction} \\
 &= \text{Cov}[X_i; X_j] && \text{from above,}
 \end{aligned}$$

798

proving (1) for  $i = N$  and  $j < i$ . For  $j = i = N$ , we similarly decompose the set of

799

paths  $\mathcal{P}_i$  into two sets, either going through  $a$  or through  $b$ :

$$\begin{aligned}
 & \sum_{\substack{p_1 \in \mathcal{P}_i \\ p_2 \in \mathcal{P}_i}} \left( \prod_{e \in p_1} \gamma_e \right) \left( \prod_{e \in p_2} \gamma_e \right) \sum_{e \in p_1 \cap p_2} \ell_e \\
 &= \sum_{\substack{p_1 \in \mathcal{P}_a \\ p_2 \in \mathcal{P}_a}} \left( \prod_{e \in p_1} \gamma_e \right) \gamma_{e_a} \left( \prod_{e \in p_2} \gamma_e \right) \gamma_{e_a} \left( \left( \sum_{e \in p_1 \cap p_2} \ell_e \right) + \ell_{e_a} \right) \\
 &\quad + 2 \times \sum_{\substack{p_1 \in \mathcal{P}_a \\ p_2 \in \mathcal{P}_b}} \left( \prod_{e \in p_1} \gamma_e \right) \gamma_{e_a} \left( \prod_{e \in p_2} \gamma_e \right) \gamma_{e_b} \sum_{e \in p_1 \cap p_2} \ell_e \\
 &\quad + \sum_{\substack{p_1 \in \mathcal{P}_b \\ p_2 \in \mathcal{P}_b}} \left( \prod_{e \in p_1} \gamma_e \right) \gamma_{e_b} \left( \prod_{e \in p_2} \gamma_e \right) \gamma_{e_b} \left( \left( \sum_{e \in p_1 \cap p_2} \ell_e \right) + \ell_{e_b} \right) \\
 &= \gamma_{e_a}^2 (\text{Cov}[X_a; X_a] + \ell_a) + 2\gamma_{e_a}\gamma_{e_b} \text{Cov}[X_a; X_b] + \gamma_{e_b}^2 (\text{Cov}[X_b; X_b] + \ell_b) \\
 &= \text{Cov}[X_i; X_i] && \text{by induction, and from above.}
 \end{aligned}$$

800

This completes the proof of (1), for  $i = j$ , and for the last case when  $i$  is a hybrid

801

node.

802

## VARIANCE REDUCTION

803

Here, we prove Formula (2). As in the main text, consider a time-consistent

804

network. For tip  $i$ , let  $t_i$  be the length of any path from the root to  $i$ . If the history of tip  $i$

805

involves one or more reticulations then take any two paths  $p_i$  and  $q_i$  in  $\mathcal{P}_i$ . We have:

806

$\sum_{e \in p_i \cap q_i} \ell_e < \sum_{e \in p_i} \ell_e = t_i$ , with a strict inequality if  $p_i$  and  $q_i$  are different paths. Seeing

807

$\pi_{p_i} = \prod_{e \in p_i} \gamma_e$  as the probability associated with the path  $p_i$  (with  $\sum_{p_i \in \mathcal{P}_i} \pi_{p_i} = 1$ ), we get

808

from Equation (1):

$$V_{ii} < \sum_{p_i, q_i \in \mathcal{P}_i} \pi_{p_i} \pi_{q_i} t_i \leq t_i,$$

809

with the equality fulfilled if there is a unique path from the root to taxon  $i$ , i.e. if  $i$  has no

810

hybrid ancestry.

811

## PAGEL'S $\lambda$ VARIANCE

812

*Proof of Proposition 2.* In Equation 1, the first equation is straightforward, because all the

813

edges shared by the paths to  $i$  and to  $j$  are internal edges, whose lengths are multiplied by

814

$\lambda$ . Now take a tip node  $i$ . The first step of the transformation ensures that  $i$  is a tree node.

815

Let  $a$  be its parent node, and parent branch  $e_a$ . From the recursive formula given in

816

Proposition 1, the variance at node  $i$  is proportional to:

$$V_{ii}(\lambda) = V(\lambda)_{aa} + \ell_{e_a}(\lambda) = \lambda V_{aa} + \lambda \ell_{e_a} + (1 - \lambda)t_i = \lambda V_{ii} + (1 - \lambda)t_i,$$

817

hence the announced formulas. □

818

## SHIFTED BM MODEL WITH THE DESCENDENCE MATRIX

819 *Proof of Formula (7).* The shifts are fixed, so they do not impact the variance structure of  
 820 the traits, and we only need to show that  $\mathbb{E}[\mathbf{Y}] = \mathbf{T}\mathbf{\Delta}$ . Here, we prove a slightly more  
 821 general formula on the complete vector of trait values at all the nodes, that is:  
 822  $\mathbb{E}[\mathbf{X}] = \mathbf{U}\mathbf{\Delta}$ . The original equality is easily derived from this one by keeping the tip values  
 823 only.

824 We show this equality recursively. Assume that the nodes are numbered in preorder.  
 825 Denote by  $\mathbf{U}^i$  the  $i^{\text{th}}$  row-vector of  $\mathbf{U}$ . Node  $i = 1$  is the root, which is the descendant of no  
 826 other node than itself, so

$$\mathbb{E}[X_1] = \mu = \Delta_1 = \mathbf{U}^1\mathbf{\Delta} .$$

827 We now assume that  $\mathbb{E}[X_j] = \mathbf{U}^j\mathbf{\Delta}$  for all nodes  $j < i$ , and we seek to prove that this  
 828 property is also true for node  $i$ .

829 • If  $i$  is a tree node, then denote by  $a$  its unique parent and by  $e_a$  the edge from  $a$  to  $i$ .  
 830 For any node  $k \neq i$ ,  $\mathcal{P}_{k \rightarrow i} = \{(p_a, e_a) : p_a \in \mathcal{P}_{k \rightarrow a}\}$ . Since  $e_a$  is a tree edge with  
 831  $\gamma_{e_a} = 1$ , we get from definition 3 that:

$$U_{ik} = \begin{cases} U_{ak} & \forall k \neq i \\ 1 & \text{if } k = i , \end{cases}$$

832 hence

$$\mathbb{E}[X_i] = \mathbb{E}[X_a] + \Delta_i = \mathbf{U}^a\mathbf{\Delta} + \Delta_i = \mathbf{U}^i\mathbf{\Delta} .$$

833 • If  $i$  is a hybrid, then denote by  $a$  and  $b$  its two parents, by  $e_a$  and  $e_b$  the  
 834 corresponding edges, with coefficients  $\gamma_{e_a}$  and  $\gamma_{e_b}$ . Then for any node  $k \neq i$ , we have:

835  $\mathcal{P}_{k \rightarrow i} = \{(p_a, e_a) : p_a \in \mathcal{P}_{k \rightarrow a}\} \cup \{(p_b, e_b) : p_b \in \mathcal{P}_{k \rightarrow b}\}$ , and using definition 3:

$$U_{ik} = \begin{cases} \gamma_{e_a} U_{ak} + \gamma_{e_b} U_{bk} & \forall k \neq i \\ 1 & \text{if } k = i. \end{cases}$$

836 Since no shift can occur on the hybrid branches,  $\Delta_i = 0$  by convention and:

$$\mathbb{E}[X_i] = \gamma_{e_a} \mathbb{E}[X_a] + \gamma_{e_b} \mathbb{E}[X_b] = \gamma_{e_a} \mathbf{U}^a \boldsymbol{\Delta} + \gamma_{e_b} \mathbf{U}^b \boldsymbol{\Delta} = \mathbf{U}^i \boldsymbol{\Delta}.$$

837 This ends the recursion, and the proof of (7). □

838 Note that this proof also gives an efficient recursive way to compute the  
839 descendance matrix  $\mathbf{U}$ .

## 840 FISHER TEST FOR TRANSGRESSIVE EVOLUTION

841 The Fisher statistics used in Section Transgressive Evolution have the following  
842 expression:

$$F_{10} = \frac{\|\mathbf{Y} - \text{Proj}_{\mathbf{R}} \mathbf{Y}\|_{(\mathbf{V}^{\text{tip}})^{-1}}^2 - \|\mathbf{Y} - \text{Proj}_{[\mathbf{R} \ \bar{\mathbf{N}}]} \mathbf{Y}\|_{(\mathbf{V}^{\text{tip}})^{-1}}^2}{\|\mathbf{Y} - \text{Proj}_{[\mathbf{R} \ \bar{\mathbf{N}}]} \mathbf{Y}\|_{(\mathbf{V}^{\text{tip}})^{-1}}^2} \frac{n - r_{[\mathbf{R} \ \bar{\mathbf{N}}]}}{r_{[\mathbf{R} \ \bar{\mathbf{N}}]} - r_{\mathbf{R}}}$$

$$F_{21} = \frac{\|\mathbf{Y} - \text{Proj}_{[\mathbf{R} \ \bar{\mathbf{N}}]} \mathbf{Y}\|_{(\mathbf{V}^{\text{tip}})^{-1}}^2 - \|\mathbf{Y} - \text{Proj}_{[\mathbf{R} \ \mathbf{N}]} \mathbf{Y}\|_{(\mathbf{V}^{\text{tip}})^{-1}}^2}{\|\mathbf{Y} - \text{Proj}_{[\mathbf{R} \ \mathbf{N}]} \mathbf{Y}\|_{(\mathbf{V}^{\text{tip}})^{-1}}^2} \frac{n - r_{[\mathbf{R} \ \mathbf{N}]}}{r_{[\mathbf{R} \ \mathbf{N}]} - r_{[\mathbf{R} \ \bar{\mathbf{N}}]}}$$

843 where  $\text{Proj}_{\mathbf{M}}$  denotes the projection onto the linear space spanned by the columns of  
844 matrix  $\mathbf{M}$ , with respect to the metric defined by  $\mathbf{V}^{\text{tip}}$ :  $\|\mathbf{X}\|_{(\mathbf{V}^{\text{tip}})^{-1}}^2 = \mathbf{X}^T (\mathbf{V}^{\text{tip}})^{-1} \mathbf{X}$ . In  
845 other words, for any vector  $\mathbf{X}$ :

$$\text{Proj}_{\mathbf{M}} \mathbf{X} = \underset{\mathbf{U} \in \text{Span}(\mathbf{M})}{\text{argmin}} \|\mathbf{X} - \mathbf{U}\|_{(\mathbf{V}^{\text{tip}})^{-1}}^2 = \mathbf{M}(\mathbf{M}^T (\mathbf{V}^{\text{tip}})^{-1} \mathbf{M})^{-1} \mathbf{M}^T (\mathbf{V}^{\text{tip}})^{-1} \mathbf{X}.$$

846 These statistics follow a noncentral Fisher distribution as given in (9) and (10) of the main  
847 text, where

$$\begin{cases} \Delta_{10}^2(\mathbf{R}, \bar{\mathbf{N}}, \mathbf{V}^{\text{tip}}) = \|(\mathbf{I} - \text{Proj}_{\mathbf{R}})\bar{\mathbf{N}}\|_{(\mathbf{V}^{\text{tip}})^{-1}}^2 \\ \Delta_{21}^2(\mathbf{d}, \mathbf{R}, \bar{\mathbf{N}}, \mathbf{N}, \mathbf{V}^{\text{tip}}) = \|(\mathbf{I} - \text{Proj}_{[\mathbf{R} \ \bar{\mathbf{N}}]})\mathbf{N}\mathbf{d}\|_{(\mathbf{V}^{\text{tip}})^{-1}}^2 \end{cases} .$$

848 When studying the power of the test  $\mathcal{H}_1$  vs  $\mathcal{H}_2$ , we took  $\mathbf{d} = d\mathbf{d}^u$ , so that the  
849 noncentral coefficient is:

$$\frac{1}{2\sigma^2}\Delta_{21}^2(\mathbf{d}, \mathbf{R}, \bar{\mathbf{N}}, \mathbf{N}, \mathbf{V}^{\text{tip}}) = \frac{d^2}{2\sigma^2} \|(\mathbf{I} - \text{Proj}_{[\mathbf{R} \ \bar{\mathbf{N}}]})\mathbf{N}\mathbf{d}^u\|_{(\mathbf{V}^{\text{tip}})^{-1}}^2$$

850 and, as the networks are fixed, it only varies with the heterogeneity coefficient  $d$ .

851 Note that a third statistic,  $F_{20}$ , can be defined in a similar way to test  $\mathcal{H}_2$  vs  $\mathcal{H}_0$   
852 directly. We first re-write the linear model as:

$$\mathbf{Y} = \mathbf{R}\boldsymbol{\beta} + \mathbf{N}\boldsymbol{\delta} + \mathbf{E}, \quad \mathbf{E} \sim \mathcal{N}(\mathbf{0}, \sigma^2\mathbf{V}^{\text{tip}}),$$

853 where there are no constraints on coefficients  $\boldsymbol{\delta}$ . Then the  $F$  statistic can be written as:

$$F_{20} = \frac{\|\mathbf{Y} - \text{Proj}_{\mathbf{R}}\mathbf{Y}\|_{(\mathbf{V}^{\text{tip}})^{-1}}^2 - \|\mathbf{Y} - \text{Proj}_{[\mathbf{R} \ \mathbf{N}]}\mathbf{Y}\|_{(\mathbf{V}^{\text{tip}})^{-1}}^2}{\|\mathbf{Y} - \text{Proj}_{[\mathbf{R} \ \mathbf{N}]}\mathbf{Y}\|_{(\mathbf{V}^{\text{tip}})^{-1}}^2} \frac{n - r_{[\mathbf{R} \ \mathbf{N}]}}{r_{[\mathbf{R} \ \mathbf{N}]} - r_{\mathbf{R}}} .$$

854 In the same way, it follows under  $\mathcal{H}_2$  a noncentral Fisher distribution:

$$F_{20} \sim \mathcal{F}\left(r_{[\mathbf{R} \ \mathbf{N}]} - r_{\mathbf{R}}, n - r_{[\mathbf{R} \ \mathbf{N}]}, \frac{1}{2\sigma^2}\Delta_{20}^2(\mathbf{d}, \mathbf{R}, \mathbf{N}, \mathbf{V}^{\text{tip}})\right),$$

855 with

$$\Delta_{20}^2(\boldsymbol{\delta}, \mathbf{R}, \mathbf{N}, \mathbf{V}^{\text{tip}}) = \|(\mathbf{I} - \text{Proj}_{\mathbf{R}})\mathbf{N}\boldsymbol{\delta}\|_{(\mathbf{V}^{\text{tip}})^{-1}}^2 .$$

856 Thank to the flexible framework provided by the GLM ftest function, all these tests are



857 readily implemented, as long as one can fit the three models ( $\mathcal{H}_0$ ,  $\mathcal{H}_1$ , and  $\mathcal{H}_2$ ).
